# Supplementary material for: Umpolung of protons from H2O: a metal-free chemoselective reduction of carbonyl compounds via B2pin2/H2O systems
Source: Royal Society of Chemistry journal article supplement (doi:10.1039/c7ob00820a), 2017-01-01

## Supporting Information

*for*

### **Umpolung of Proton from H<sub>2</sub>O: A Metal-free Selective Reduction of Carbonyl Compounds Mediated by Diboron Reagents**

Qingqing Xuan<sup>a</sup>, Cong Zhao <sup>a</sup> and Qiuling Song<sup>a, \*</sup>

<sup>a</sup> Institute of Next Generation Matter Transformation, College of Chemical Engineering at Huaqiao University, Xiamen, Fujian, 361021, P. R. China  
Email: qsong@hqu.edu.cn

### **Table of Contents**

|                                                                                 |           |
|---------------------------------------------------------------------------------|-----------|
| <b>I. General Methods.....</b>                                                  | <b>1</b>  |
| <b>II. Hydrogenation of Ketones in the Presence of Pd(OAc)<sub>2</sub>.....</b> | <b>2</b>  |
| <b>III. Hydrogenation of Ketones under Metal-free Conditions.....</b>           | <b>3</b>  |
| <b>IV. Analytic data of products .....</b>                                      | <b>4</b>  |
| <b>V. <sup>1</sup>H and <sup>13</sup>C NMR spectra of products .....</b>        | <b>14</b> |

## I. General Methods

Unless otherwise noted, otherwise noted, all reagents were obtained from commercial suppliers and were used without further purification.  $^1\text{H}$ ,  $^{13}\text{C}$  spectra were recorded in  $\text{CDCl}_3$  on a Bruker AVIII-500M spectrometers. Chemical shifts are reported in ppm from tetramethylsilane with the solvent resonance as the internal standard. The following abbreviations were used to designate chemical shift multiplicities: s = singlet, d = doublet, t = triplet, m = multiplet. Column chromatography was performed using silica gel (200-300 mesh).

**General Optimization Procedure:** To a reaction tube equipped with a stir bar, 76.2 mg of  $\text{B}_2\text{pin}_2$  (0.3 mmol), 4.5mg  $\text{Pd}(\text{OAc})_2$  (0.02 mmol) and base (0.02 mmol) were added. Next, 24.0mg (0.2 mmol) of acetophenone (**1a**) and  $\text{H}_2\text{O}$  (2ml) was added via syringe, then sealed the reaction tube. The mixture was stirred at  $60^\circ\text{C}$  for about 10h. After the reaction was finished, the mixture was extracted with ethyl acetate, repeat three times. The combined organic layer was evaporated under reduced pressure, and the product was purified by column chromatography.

## II. Hydrogenation of Ketones in the Presence of $\text{Pd}(\text{OAc})_2$

The reaction was first carried out with  $\text{Pd}(\text{OAc})_2$  under  $\text{N}_2$ , the solvents, bases were also screened (Table 2). Protic solvent, for example ethanol could also offered excellent result (Entry 2). However, aprotic solvent was detrimental to our reaction, only trace amount product was detected by GC-MS (Entry 3). Other bases, such as DIPEA, DBU were also investigated, both of them could afforded satisfied conversions; however the ratio of **2a** and **3a** was affected largely by different bases (Entry 1& 4-5). The influence of Lewis acid was also considered, when  $\text{MgSO}_4$  was added to our catalytic system, the conversion suffered a little decrement, however the ratio of **2a** and **3a** was affected largely, that **3a** was changed to the major product.

Table S1 Hydrogenation of Ketones in the Presence of Pd(OAc)<sub>2</sub>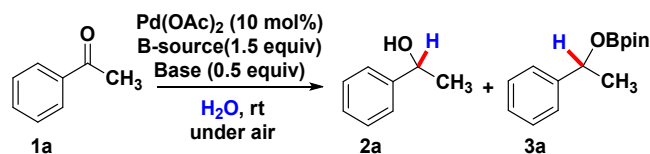

| Entry          | B-Source                        | Base                            | Solvent            | Conversion <sup>a</sup> | Ratio of A/B (%) <sup>a</sup> |
|----------------|---------------------------------|---------------------------------|--------------------|-------------------------|-------------------------------|
| 1              | B <sub>2</sub> pin <sub>2</sub> | Cs <sub>2</sub> CO <sub>3</sub> | H <sub>2</sub> O   | quantively              | 63/37                         |
| 2              | B <sub>2</sub> pin <sub>2</sub> | Cs <sub>2</sub> CO <sub>3</sub> | EtOH               | quantively              | 57/43                         |
| 3              | B <sub>2</sub> pin <sub>2</sub> | Cs <sub>2</sub> CO <sub>3</sub> | CH <sub>3</sub> CN | trace                   | -                             |
| 4              | B <sub>2</sub> pin <sub>2</sub> | DIPEA                           | H <sub>2</sub> O   | quantively              | 54/46                         |
| 5              | B <sub>2</sub> pin <sub>2</sub> | DBU                             | H <sub>2</sub> O   | quantively              | 85/15                         |
| 6 <sup>b</sup> | B <sub>2</sub> pin <sub>2</sub> | Cs <sub>2</sub> CO <sub>3</sub> | H <sub>2</sub> O   | 88%                     | 30/70                         |

<sup>a</sup> Determined by GC-MS. <sup>b</sup> MgSO<sub>4</sub>(0.5 eq) was added

### III. Hydrogenation of Ketones under Metal-free Conditions

Under metal-free conditions the kinds of bases and the their amounts was investigated. It showed that stoichiometric bases and diboron compounds were necessary. With stoichiometric diboron compounds, different ambient atmospheres had little effect on the conversion of **1a** (entry 1 vs 2). However, when B<sub>2</sub>pin<sub>2</sub> was reduced to 0.5 equiv, the conversion was reduced to 23% (Entry 8). When further reduced the amount of B<sub>2</sub>pin<sub>2</sub>, the conversion suffered a lot, less than 10% (entry 9).

Table S2 Hydrogenation of Ketones under Metal-free Conditions

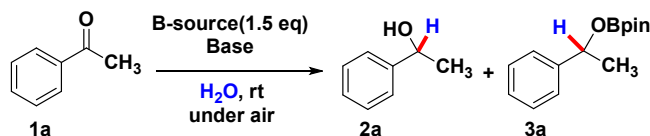

| Entry          | Base                                        | B-Source                        | Conversion <sup>b</sup> | Ratio(2a/3a)(%) <sup>b</sup> |
|----------------|---------------------------------------------|---------------------------------|-------------------------|------------------------------|
| 1 <sup>c</sup> | Cs <sub>2</sub> CO <sub>3</sub> (0.5 equiv) | B <sub>2</sub> pin <sub>2</sub> | 51%                     | 78/22                        |
| 2              | Cs <sub>2</sub> CO <sub>3</sub> (0.5 equiv) | B <sub>2</sub> pin <sub>2</sub> | 52%                     | 81/19                        |
| 3              | Cs <sub>2</sub> CO <sub>3</sub> (1.0 equiv) | B <sub>2</sub> pin <sub>2</sub> | 78%                     | 80/20                        |
| 4 <sup>d</sup> | Cs <sub>2</sub> CO <sub>3</sub> (1.0 equiv) | B <sub>2</sub> pin <sub>2</sub> | 95%                     | 85/15                        |

|                  |                 |                                             |       |                 |
|------------------|-----------------|---------------------------------------------|-------|-----------------|
| 5 <sup>d</sup>   | DBU (1.0 equiv) | B <sub>2</sub> pin <sub>2</sub>             | 98%   | 86/14           |
| 6 <sup>d</sup>   | DBU (0.5 equiv) | B <sub>2</sub> pin <sub>2</sub>             | 71%   | ND <sup>e</sup> |
| 7 <sup>d</sup>   | DBU (0.2 equiv) | B <sub>2</sub> pin <sub>2</sub>             | 25%   | ND <sup>e</sup> |
| 8 <sup>d</sup>   | DBU (1.0 equiv) | B <sub>2</sub> pin <sub>2</sub> (0.5 equiv) | 23%   | ND <sup>e</sup> |
| 9 <sup>d,c</sup> | DBU (1.0 equiv) | B <sub>2</sub> pin <sub>2</sub> (0.2 equiv) | < 10% | ND <sup>e</sup> |

<sup>a</sup> General procedure: **1a** (0.2 mmol), B-source (0.24 mmol), H<sub>2</sub>O (2ml), under air. <sup>b</sup> Determined by GC-MS. <sup>c</sup> The reactions were carried out under N<sub>2</sub>. <sup>d</sup>The reaction was carried out at 60 °C. <sup>e</sup>Not detected.

#### IV. Analytic data of products

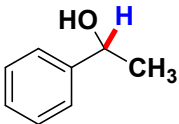 **1-phenylethan-1-ol (2a):** shallow yellow oil (89% yield, 21.7 mg); <sup>1</sup>H NMR (500 MHz, CDCl<sub>3</sub>) δ 7.40 (dd, *J* = 9.2, 6.9 Hz, 4H), 7.33 – 7.28 (m, 1H), 4.93 (q, *J* = 6.4 Hz, 1H), 1.94 (s, 1H), 1.53 (d, *J* = 6.5 Hz, 3H). <sup>13</sup>C NMR (126 MHz, CDCl<sub>3</sub>) δ 145.73 (s), 128.52 (s), 127.50 (s), 125.39 (s), 25.04 (s).

Wei, S.; Du, H. *J. Am. Chem. Soc.* **2014**, *136*, 12261.

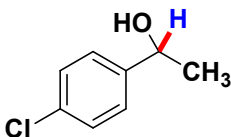 **1-(4-chlorophenyl)ethan-1-ol (2b):** Shallow yellow liquid (86% yield, 26.8 mg); <sup>1</sup>H NMR (500 MHz, CDCl<sub>3</sub>) δ 7.35 – 7.30 (m, 4H), 4.88 (q, *J* = 6.4 Hz, 1H), 2.10 (s, 1H), 1.48 (d, *J* = 6.5 Hz, 3H). <sup>13</sup>C NMR (126 MHz, CDCl<sub>3</sub>) δ 144.24 (s), 133.05 (s), 128.60 (s), 126.80 (s), 69.74 (s), 25.27 (s).

Wei, S.; Du, H. *J. Am. Chem. Soc.* **2014**, *136*, 12261.

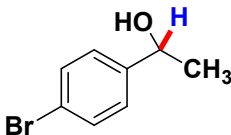 **1-(4-bromophenyl)ethan-1-ol (2c):** Shallow yellow liquid (85% yield, 34.1 mg) <sup>1</sup>H NMR (500 MHz, CDCl<sub>3</sub>) δ 7.50 – 7.46 (m, 2H), 7.25 (t, *J* = 5.4 Hz, 2H), 4.87 (q, *J* = 6.4 Hz, 1H), 2.12 (s, 1H), 1.48 (d, *J* = 6.5 Hz, 3H). <sup>13</sup>C NMR (126 MHz, CDCl<sub>3</sub>) δ 144.77 (s), 131.55 (s),

127.16 (s), 121.15 (s), 69.77 (s), 25.25 (s).

Xu, W.; Wu, G.; Yao, W.; Fan, H.; Wu, J.; Chen, P. *Chem. Eur. J.* **2012**, *18*, 13885.

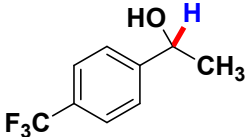 **1-(4-(trifluoromethyl)phenyl)ethan-1-ol (2d)**: Shallow yellow liquid (81%, 30.8 mg) <sup>1</sup>H NMR (500 MHz, CDCl<sub>3</sub>) δ 7.62 (d, *J* = 8.1 Hz, 2H), 7.49 (d, *J* = 8.0 Hz, 2H), 4.96 (q, *J* = 6.4 Hz, 1H), 2.32 (s, 1H), 1.51 (d, *J* = 6.5 Hz, 3H). <sup>13</sup>C NMR (126 MHz, CDCl<sub>3</sub>) δ 149.68 (s), 129.60 (q, *J* = 32.3 Hz), 125.64 (s), 125.42 (q, *J* = 3.8 Hz), 124.16 (q, *J* = 271.9 Hz), 69.79 (s), 25.33 (s).

Gladioli, S.; Alberico, E. *Chem. Soc. Rev.* **2006**, *35*, 226.

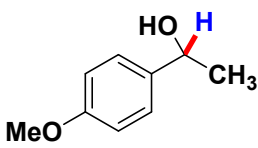 **1-(4-methoxyphenyl)ethan-1-ol (2e)**: Colourless liquid (80% yield, 24.3 mg) <sup>1</sup>H NMR (500 MHz, CDCl<sub>3</sub>) δ 7.33 – 7.28 (m, 2H), 6.95 – 6.85 (m, 2H), 4.84 (q, *J* = 6.4 Hz, 1H), 3.81 (s, 3H), 2.32 (s, 1H), 1.48 (d, *J* = 6.5 Hz, 3H). <sup>13</sup>C NMR (126 MHz, CDCl<sub>3</sub>) δ 158.91 (s), 138.07 (s), 126.68 (s), 113.82 (s), 69.89 (s), 55.29 (s), 25.03 (s).

Xu, W.; Wu, G.; Yao, W.; Fan, H.; Wu, J.; Chen, P. *Chem. Eur. J.* **2012**, *18*, 13885.

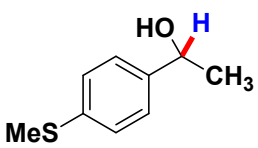 **1-(4-(methylthio)phenyl)ethan-1-ol (2f)**: Shallow yellow liquid (82% yield, 27.6 mg) <sup>1</sup>H NMR (500 MHz, CDCl<sub>3</sub>) δ 7.33 – 7.29 (m, 2H), 7.28 – 7.24 (m, 2H), 4.87 (q, *J* = 6.4 Hz, 1H), 2.50 (s, 3H), 2.02 (s, 1H), 1.49 (d, *J* = 6.5 Hz, 3H). <sup>13</sup>C NMR (126 MHz, CDCl<sub>3</sub>) δ 142.79 (s), 137.41 (s), 126.83 (s), 125.99 (s), 69.99 (s), 25.10 (s), 16.02 (s).

Yu, J.; Jiao, L.; Yang, Y.; Wu, W.; Xue, P.; Chung, L. W.; Dong, X.-Q.; Zhang, X. *Org. Lett.* **2017**, *19*, 690.

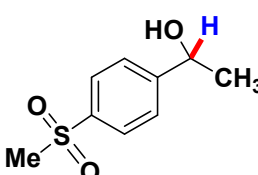 **1-(4-(methylsulfonyl)phenyl)ethan-1-ol (2g)**: White solid (80% yield, 32.0 mg) <sup>1</sup>H NMR (500 MHz, CDCl<sub>3</sub>) δ 7.88 (d, *J* = 8.4 Hz, 2H), 7.57 (d, *J* = 8.2 Hz, 2H), 5.00 (q, *J* = 6.4 Hz,

1H), 3.05 (s, 3H), 2.45 (s, 1H), 1.51 (d,  $J = 6.5$  Hz, 3H).  $^{13}\text{C}$  NMR (126 MHz,  $\text{CDCl}_3$ )  $\delta$  152.28 (s), 139.15 (s), 127.54 (s), 126.30 (s), 69.53 (s), 44.55 (s), 25.47 (s).

Mahdi, T.; Stephan, D. W. *Angew. Chem., Int. Ed.* **2015**, *54*, 8511.

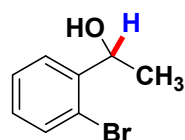

**1-(2-bromophenyl)ethan-1-ol (2h):** Shallow yellow liquid (83% yield, 33 mg)  $^1\text{H}$  NMR (500 MHz,  $\text{CDCl}_3$ )  $\delta$  7.62 (dd,  $J = 7.7, 1.5$  Hz, 1H), 7.54 (dd,  $J = 8.0, 1.1$  Hz, 1H), 7.36 (dd,  $J = 10.9, 4.2$  Hz, 1H), 7.15 (td,  $J = 7.8, 1.7$  Hz, 1H), 5.26 (q,  $J = 6.4$  Hz, 1H), 2.10 (s, 1H), 1.51 (d,  $J = 6.4$  Hz, 3H).  $^{13}\text{C}$  NMR (126 MHz,  $\text{CDCl}_3$ )  $\delta$  144.64 (s), 132.65 (s), 128.76 (s), 127.85 (s), 126.67 (s), 121.71 (s), 69.18 (s), 23.60 (s).

Vega, E.; Lastra, E.; Gamasa, M. P., *Inorg. Chem.* **2013**, *52*, 6193.

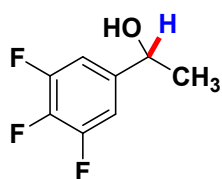

**1-(3,4,5-trifluorophenyl)ethan-1-ol (2i):** Shallow yellow liquid (79% yield, 27.8 mg)  $^1\text{H}$  NMR (500 MHz,  $\text{CDCl}_3$ )  $\delta$  7.02 (dd,  $J = 7.8, 7.0$  Hz, 2H), 4.86 (q,  $J = 6.3$  Hz, 1H), 2.00 (s, 1H), 1.48 (d,  $J = 6.5$  Hz, 3H).  $^{13}\text{C}$  NMR (126 MHz,  $\text{CDCl}_3$ )  $\delta$  152.18 (dd,  $J = 10.0, 3.9$  Hz), 150.19 (dd,  $J = 10.0, 3.8$  Hz), 142.09 (d,  $J = 4.3$  Hz), 138.73 (d,  $J = 250.4$  Hz), 109.32 (dd,  $J = 16.5, 5.0$  Hz), 69.06 (s), 25.35 (s).

Brandt, P.; Roth, P.; Andersson, P. G. *J. Org. Chem.* **2004**, *69*, 4885.

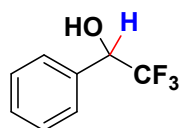

**2,2,2-trifluoro-1-phenylethan-1-ol (2j):** Shallow yellow liquid (91% yield, 32.0 mg).  $^1\text{H}$  NMR (500 MHz,  $\text{CDCl}_3$ )  $\delta$  7.53 – 7.48 (m, 2H), 7.48 – 7.41 (m, 3H), 5.02 (s, 1H);  $^{13}\text{C}$  NMR (126 MHz,  $\text{CDCl}_3$ )  $\delta$  134.08 (s), 129.52 (s), 128.61 (s), 127.47 (s), 124.30 (d,  $J = 282.1$  Hz), 72.76 (q,  $J = 31.9$  Hz).

Gladiali, S.; Alberico, E. *Chem. Soc. Rev.* **2006**, *35*, 226.

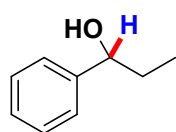

**1-phenylpropan-1-ol (2k):** Colour less liquid (89% yield, 24.2 mg)  $^1\text{H}$  NMR (500 MHz,  $\text{CDCl}_3$ )  $\delta$  7.41 – 7.34 (m, 4H), 7.31 (ddd,  $J = 8.4, 5.5, 3.3$  Hz, 1H), 4.61 (t,  $J = 6.6$  Hz, 1H), 2.01 (s, 1H), 1.88 – 1.81 (m,

1H), 1.81 – 1.74 (m, 1H), 0.94 (t,  $J = 7.4$  Hz, 3H).  $^{13}\text{C}$  NMR (126 MHz,  $\text{CDCl}_3$ )  $\delta$  144.59 (s), 128.41 (s), 127.50 (s), 125.98 (s), 76.04 (s), 31.89 (s), 10.16 (s).

Vega, E.; Lastra, E.; Gamasa, M. P., *Inorg. Chem.* **2013**, 52, 6193.

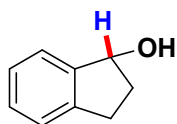

**2,3-dihydro-1H-inden-1-ol (2l)**: Shallow yellow liquid 5-fluoro-2,3-dihydro-1H-inden-1-ol  $^1\text{H}$  NMR (500 MHz,  $\text{CDCl}_3$ )  $\delta$  7.46 – 7.41 (m, 1H), 7.32 – 7.24 (m, 3H), 5.26 (t,  $J = 6.0$  Hz, 1H), 3.08 (ddd,  $J = 15.9$ , 8.5, 4.8 Hz, 1H), 2.90 – 2.79 (m, 1H), 2.51 (dddd,  $J = 13.2$ , 8.3, 6.9, 4.8 Hz, 1H), 2.04 (s, 1H), 2.00 – 1.92 (m, 1H).  $^{13}\text{C}$  NMR (126 MHz,  $\text{CDCl}_3$ )  $\delta$  144.99 (s), 143.33 (s), 128.32 (s), 126.71 (s), 124.91 (s), 124.21 (s), 76.43 (s), 35.93 (s), 29.81 (s).

Wei, S.; Du, H. *J. Am. Chem. Soc.* **2014**, 136, 12261.

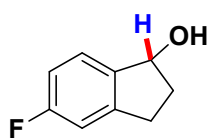

**5-fluoro-2,3-dihydro-1H-inden-1-ol (2m)**: Shallow yellow liquid (85% yield, 25.8 mg)  $^1\text{H}$  NMR (500 MHz,  $\text{CDCl}_3$ )  $\delta$  7.43 – 7.33 (m, 1H), 6.94 (dd,  $J = 12.5$ , 5.7 Hz, 2H), 5.29 – 5.17 (m, 1H), 3.07 (ddd,  $J = 15.7$ , 8.4, 5.1 Hz, 1H), 2.88 – 2.78 (m, 1H), 2.53 (dddd,  $J = 13.4$ , 8.4, 6.8, 5.1 Hz, 1H), 2.00 (dddd,  $J = 13.4$ , 8.5, 6.3, 5.0 Hz, 1H), 1.84 (s, 1H).  $^{13}\text{C}$  NMR (126 MHz,  $\text{CDCl}_3$ )  $\delta$  163.26 (d,  $J = 245.3$  Hz), 145.77 (d,  $J = 8.5$  Hz), 140.63 (s), 125.45 (d,  $J = 9.2$  Hz), 113.82 (d,  $J = 22.8$  Hz), 111.73 (d,  $J = 22.0$  Hz), 75.65 (s), 36.36 (s), 29.86 (d,  $J = 2.1$  Hz).

Adcock, W.; Gupta, B. D.; Kitching, W.; Doddrell, D. *J. Organomet. Chem.* **1975**, 102, 297.

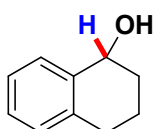

**1,2,3,4-tetrahydronaphthalen-1-ol (2n)**: Shallow yellow liquid (78% yield, 23.2 mg)  $^1\text{H}$  NMR (500 MHz,  $\text{CDCl}_3$ )  $\delta$  7.46 (dd,  $J = 5.8$ , 3.2 Hz, 1H), 7.28 – 7.20 (m, 2H), 7.18 – 7.09 (m, 1H), 4.80 (d,  $J = 4.4$  Hz, 1H), 2.86 (dt,  $J = 16.4$ , 5.3 Hz, 1H), 2.75 (dt,  $J = 16.6$ , 6.8 Hz, 1H), 2.06 – 1.97 (m, 2H), 1.94 (ddd,  $J = 4.9$ , 4.4, 3.5 Hz, 1H), 1.87 (s, 1H), 1.85 – 1.78 (m, 1H).  $^{13}\text{C}$  NMR (126

MHz, CDCl<sub>3</sub>) δ 138.80 (s), 137.13 (s), 129.02 (s), 128.67 (s), 127.59 (s), 126.18 (s), 68.16 (s), 32.28 (s), 29.26 (s), 18.81 (s).

Gladioli, S.; Alberico, E. *Chem. Soc. Rev.* **2006**, *35*, 226.

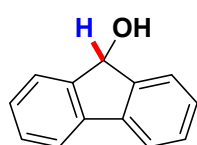

**9H-fluoren-9-ol (2o)**: White solide (65% yield, 23.7 mg) <sup>1</sup>H NMR (500 MHz, CDCl<sub>3</sub>) δ 7.66 (t, *J* = 7.3 Hz, 4H), 7.42 (t, *J* = 7.5 Hz, 2H), 7.38 – 7.31 (m, 2H), 5.59 (d, *J* = 6.7 Hz, 1H), 1.99 (d, *J* = 8.4 Hz, 1H). <sup>13</sup>C NMR (126 MHz, CDCl<sub>3</sub>) δ 145.64 (s), 140.00 (s), 129.08 (s), 127.82 (s), 125.14 (s), 119.98 (s), 75.24 (s).

Kuroda, Y.; Harada, S.; Oonishi, A.; Kiyama, H.; Yamaoka, Y.; Yamada, K.-i.; Takasu, K. *Angew. Chem., Int. Ed.* **2016**, *55*, 13137.

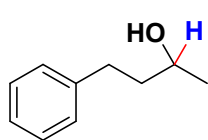

**4-phenylbutan-2-ol (2p)**: Colour less liquid (82% yield, 24.6 mg) <sup>1</sup>H NMR (500 MHz, CDCl<sub>3</sub>) δ 7.32 (t, *J* = 7.5 Hz, 2H), 7.22 (dd, *J* = 12.3, 7.2 Hz, 3H), 3.86 (dq, *J* = 12.4, 6.2 Hz, 1H), 2.84 – 2.75 (m, 1H), 2.70 (ddd, *J* = 13.8, 9.2, 7.1 Hz, 1H), 1.86 – 1.76 (m, 2H), 1.64 – 1.49 (m, 1H), 1.26 (d, *J* = 6.2 Hz, 3H). <sup>13</sup>C NMR (126 MHz, CDCl<sub>3</sub>) δ 142.07 (s), 128.41 (s), 125.83 (s), 67.54 (s), 40.86 (s), 32.16 (s), 23.64 (s).

Mahdi, T.; Stephan, D. W. *J. Am. Chem. Soc.* **2014**, *136*, 15809.

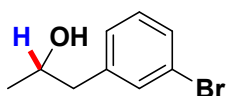

**1-(3-bromophenyl)propan-2-ol (2q)**: Shallow yellow liquid (84% yield, 35.9 mg) <sup>1</sup>H NMR (500 MHz, CDCl<sub>3</sub>) δ 7.39 (d, *J* = 7.7 Hz, 2H), 7.19 (dt, *J* = 15.8, 4.1 Hz, 2H), 4.04 (dq, *J* = 12.4, 6.1 Hz, 1H), 2.77 (dd, *J* = 13.6, 4.8 Hz, 1H), 2.69 (dd, *J* = 13.6, 7.9 Hz, 1H), 1.66 (s, 1H), 1.27 (d, *J* = 6.2 Hz, 3H). <sup>13</sup>C NMR (126 MHz, CDCl<sub>3</sub>) δ 140.97 (s), 132.39 (s), 130.04 (s), 129.59 (s), 128.07 (s), 122.57 (s), 68.68 (s), 45.28 (s), 22.93 (s).

Hu, X.; Zhang, G.; Bu, F.; Lei, A. *ACS Catal.* **2017**, *7*, 1432.



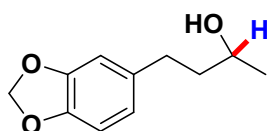

**4-(benzo[d][1,3]dioxol-5-yl)butan-2-ol (2r):** Shallow yellow

liquid (87% yield, 34.6 mg)  $^1\text{H NMR}$  (500 MHz,  $\text{CDCl}_3$ )  $\delta$

6.77 – 6.70 (m, 2H), 6.67 (d,  $J = 7.9$  Hz, 1H), 5.94 (s, 2H),

3.83 (dq,  $J = 12.4, 6.2$  Hz, 1H), 2.73 – 2.59 (m, 2H), 1.80 – 1.72 (m, 2H), 1.24 (d,  $J =$

6.2 Hz, 3H).  $^{13}\text{C NMR}$  (126 MHz,  $\text{CDCl}_3$ )  $\delta$  147.58 (s), 145.59 (s), 135.88 (s), 121.06

(s), 108.87 (s), 108.17 (s), 100.76 (s), 67.40 (s), 41.06 (s), 31.88 (s), 23.66 (s).

Yi, J.; Lu, X.; Sun, Y.-Y.; Xiao, B.; Liu, L. *Angew. Chem., Int. Ed.* **2013**, *52*, 12409.

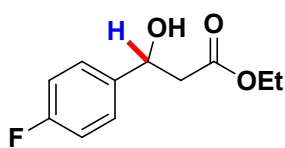

**ethyl 3-(4-fluorophenyl)-3-hydroxypropanoate (2s):**

Shallow yellow liquid (85% yield, 36.0 mg)  $^1\text{H NMR}$  (500

MHz,  $\text{CDCl}_3$ )  $\delta$  7.45 – 7.31 (m, 2H), 7.11 – 6.96 (m, 2H),

5.13 (dd,  $J = 5.5, 3.2$  Hz, 1H), 4.20 (q,  $J = 7.1$  Hz, 2H), 3.42 (d,  $J = 3.0$  Hz, 1H), 2.72

(qd,  $J = 16.4, 6.4$  Hz, 2H), 1.28 (t,  $J = 7.1$  Hz, 3H).  $^{13}\text{C NMR}$  (126 MHz,  $\text{CDCl}_3$ )  $\delta$

172.33 (s), 162.28 (d,  $J = 245.8$  Hz), 138.28 (s), 127.38 (d,  $J = 8.1$  Hz), 115.37 (d,  $J =$

21.5 Hz), 69.69 (s), 60.97 (s), 43.33 (s), 14.14 (s).

Ariger, M. A.; Carreira, E. M. *Org. Lett.* **2012**, *14*, 4522.

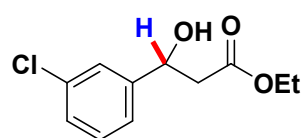

**ethyl 3-(3-chlorophenyl)-3-hydroxypropanoate (2t):**

Shallow yellow liquid (85% yield, 37.8 mg)  $^1\text{H NMR}$  (500

MHz,  $\text{CDCl}_3$ )  $\delta$  7.41 (d,  $J = 1.6$  Hz, 1H), 7.32 – 7.24 (m,

3H), 5.17 – 5.05 (m, 1H), 4.20 (q,  $J = 7.1$  Hz, 2H), 3.53 (d,  $J = 3.2$  Hz, 1H), 2.75 –

2.69 (m, 2H), 1.28 (t,  $J = 7.2$  Hz, 3H).  $^{13}\text{C NMR}$  (126 MHz,  $\text{CDCl}_3$ )  $\delta$  172.22 (s),

144.58 (s), 134.45 (s), 129.82 (s), 127.88 (s), 125.95 (s), 123.81 (s), 69.65 (s), 61.04

(s), 43.18 (s), 14.14 (s).

Niu, Z.; Chen, J.; Chen, Z.; Ma, M.; Song, C.; Ma, Y. *J. Org. Chem.* **2015**, *80*, 602.

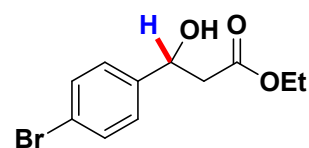

**ethyl 3-(4-bromophenyl)-3-hydroxypropanoate(2u):**

Shallow yellow liquid (81% yield, 44.1 mg)  $^1\text{H NMR}$  (500

MHz,  $\text{CDCl}_3$ )  $\delta$  7.52 – 7.48 (m, 2H), 7.28 (d,  $J = 8.1$  Hz,

2H), 5.14 – 5.07 (m, 1H), 4.20 (q,  $J = 7.1$  Hz, 2H), 3.44 (d,  $J = 2.6$  Hz, 1H), 2.71 (dd,  $J = 6.4, 3.0$  Hz, 2H), 1.29 (t,  $J = 7.1$  Hz, 3H).  $^{13}\text{C}$  NMR (126 MHz,  $\text{CDCl}_3$ )  $\delta$  172.25 (s), 141.51 (s), 131.63 (s), 127.43 (s), 121.59 (s), 69.67 (s), 61.03 (s), 43.14 (s), 14.15 (s).

Ariger, M. A.; Carreira, E. M. *Org. Lett.* **2012**, *14*, 4522

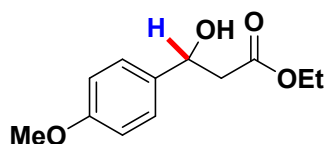

**ethyl 3-hydroxy-3-(4-methoxyphenyl)propanoate (2v):**

Shallow yellow liquid (79% yield, 35.4 mg)  $^1\text{H}$  NMR (500 MHz,  $\text{CDCl}_3$ )  $\delta$  7.44 – 7.29 (m, 2H), 6.98 – 6.85 (m, 2H), 5.10 (d,  $J = 9.1$  Hz, 1H), 4.19 (q,  $J = 7.1$  Hz, 2H), 3.82 (s, 3H), 3.28 (d,  $J = 2.4$  Hz, 1H), 2.77 (dd,  $J = 16.2, 9.3$  Hz, 1H), 2.69 (dd,  $J = 16.2, 3.7$  Hz, 1H), 1.28 (t,  $J = 7.1$  Hz, 4H).  $^{13}\text{C}$  NMR (126 MHz,  $\text{CDCl}_3$ )  $\delta$  172.44 (s), 159.18 (s), 134.73 (s), 126.98 (s), 113.90 (s), 69.97 (s), 60.85 (s), 55.29 (s), 43.35 (s), 14.16 (s).

Ariger, M. A.; Carreira, E. M. *Org. Lett.* **2012**, *14*, 4522

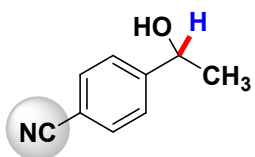

**4-(1-hydroxyethyl)benzotrile (2w):** Shallow yellow liquid

(89% yield, 26.2 mg)  $^1\text{H}$  NMR (500 MHz,  $\text{CDCl}_3$ )  $\delta$  7.66 (d,  $J = 8.4$  Hz, 2H), 7.51 (d,  $J = 8.1$  Hz, 2H), 4.99 (q,  $J = 6.5$  Hz, 1H), 1.52 (d,  $J = 6.5$  Hz, 3H).  $^{13}\text{C}$  NMR (126 MHz,  $\text{CDCl}_3$ )  $\delta$  151.04 (s), 132.37 (s), 126.06 (s), 118.86 (s), 111.13 (s), 69.70 (s), 25.44 (s).

Kallmeier, F.; Irrgang, T.; Dietel, T.; Kempe, R. *Angew. Chem., Int. Ed.* **2016**, *55*, 11806.

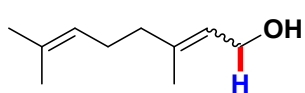

**Geraniol (2x):** Shallow yellow liquid (74% yield, 22.8mg)

$^1\text{H}$  NMR (500 MHz,  $\text{CDCl}_3$ )  $\delta$  5.44 (ddd,  $J = 10.5, 8.1, 4.2$  Hz, 1H), 5.16 – 5.09 (m, 1H), 4.14 (dd,  $J = 31.5, 7.0$  Hz, 2H), 2.15 – 2.03 (m, 4H), 1.77 – 1.69 (m, 6H), 1.62 (s, 3H).  $^{13}\text{C}$  NMR (126 MHz,  $\text{CDCl}_3$ )  $\delta$  139.97 (s), 139.76 (s), 132.45 (s), 131.74 (s), 124.40 (s), 123.85 (d,  $J = 8.9$  Hz), 123.31 (s), 59.39 (s),

58.97 (s), 39.54 (s), 31.96 (s), 26.45 (d,  $J = 17.5$  Hz), 25.67 (d,  $J = 2.4$  Hz), 23.42 (s), 17.67 (d,  $J = 3.8$  Hz), 16.27 (s).

C. Milone, M. L. Tropeano, G. Gulino, G. Neri, R. Ingoglia and S. Galvagno, *Chem. Commun.*, **2002**, 868.

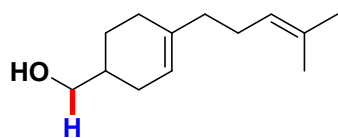

**myrac alcohol (2y)**: Shallow yellow liquid (78% yield, 24.3 mg) <sup>1</sup>H NMR (500 MHz, CDCl<sub>3</sub>) δ 5.45 – 5.38 (m, 1H), 5.12 (dddd,  $J = 7.0, 5.6, 2.7, 1.3$  Hz, 1H), 3.62 – 3.51 (m, 2H), 2.13 – 1.96 (m, 7H), 1.89 – 1.71 (m, 4H), 1.70 (d,  $J = 0.9$  Hz, 3H), 1.62 (s, 3H). <sup>13</sup>C NMR (126 MHz, CDCl<sub>3</sub>) δ 137.81 (s), 131.39 (s), 124.34 (s), 119.44 (s), 67.86 (s), 37.71 (s), 36.36 (s), 28.22 (s), 27.80 (s), 26.47 (s), 25.72 (s), 25.66 (s), 17.70 (s).

Mimoun, H. *J. Org. Chem.* **1999**, *64*, 2582.

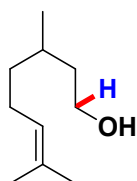

**Citronellol (2z)**: Shallow yellow liquid (79% yield, 30.7mg) <sup>1</sup>H NMR (500 MHz, CDCl<sub>3</sub>) δ 5.12 (tdd,  $J = 5.8, 2.8, 1.4$  Hz, 1H), 3.77 – 3.64 (m, 2H), 2.01 (td,  $J = 15.8, 7.1$  Hz, 2H), 1.70 (d,  $J = 1.0$  Hz, 3H), 1.66 (dd,  $J = 7.3, 5.6$  Hz, 1H), 1.63 (d,  $J = 3.7$  Hz, 3H), 1.60 – 1.55 (m, 1H), 1.45 – 1.39 (m, 1H), 1.39 – 1.32 (m, 2H), 0.93 (d,  $J = 6.6$  Hz, 3H). <sup>13</sup>C NMR (126 MHz, CDCl<sub>3</sub>) δ 131.29 (s), 124.70 (s), 61.23 (s), 39.91 (s), 37.21 (s), 29.16 (s), 25.73 (s), 25.46 (s), 19.53 (s), 17.66 (s).

Hua, Y.; Guo, Z.; Han, H.; Wei, X. *Organometallics* **2017**, *36*, 877.

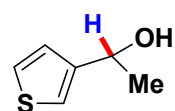

**1-(thiophen-3-yl)ethan-1-ol (2aa)**: Shallow yellow liquid (89% yield, 22.8mg); <sup>1</sup>H NMR (500 MHz, CDCl<sub>3</sub>) δ 7.27 (dd,  $J = 4.9, 1.3$  Hz, 1H), 7.03 – 6.98 (m, 2H), 5.20 – 5.12 (m, 1H), 2.02 (d,  $J = 4.2$  Hz, 1H), 1.63 (d,  $J = 6.4$  Hz, 3H). <sup>13</sup>C NMR (126 MHz, CDCl<sub>3</sub>) δ 149.85 (s), 126.67 (s), 124.46 (s), 123.20 (s), 66.29 (s), 25.28 (s).

Polshettiwar, V.; Varma, R. S. *Green Chem.* **2009**, *11*, 1313.

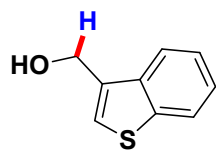

**benzo[b]thiophen-3-ylmethanol (2ab)**: Shallow yellow liquid (85% yield, 27.9 mg);  $^1\text{H}$  NMR (500 MHz,  $\text{CDCl}_3$ )  $\delta$  7.89 (ddd,  $J = 5.8, 5.4, 1.5$  Hz, 2H), 7.45 – 7.38 (m, 3H), 4.96 (d,  $J = 0.6$  Hz, 2H), 1.90 (s, 1H).  $^{13}\text{C}$  NMR (126 MHz,  $\text{CDCl}_3$ )  $\delta$  140.81 (s), 137.67 (s), 135.97 (s), 124.60 (s), 124.23 (s), 123.86 (s), 122.90 (s), 121.95 (s), 59.85 (s).

Huang, H.-M.; Procter, D. J. *J. Am. Chem. Soc.* **2017**, *139*, 1661.

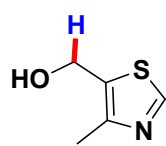

**(4-methylthiazol-5-yl)methanol (2ac)**: Shallow yellow liquid (79% yield, 20.4 mg);  $^1\text{H}$  NMR (500 MHz,  $\text{CDCl}_3$ )  $\delta$  8.67 (s, 1H), 4.85 (s, 2H), 2.46 (s, 3H), 2.29 (s, 1H).  $^{13}\text{C}$  NMR (126 MHz,  $\text{CDCl}_3$ )  $\delta$  151.20 (s), 149.89 (s), 130.96 (s), 56.69 (s), 14.95 (s).

Russell, M. G. N.; Carling, R. W.; Atack, J. R.; Bromidge, F. A.; Cook, S. M.; Hunt, P.; Isted, C.; Lucas, M.; McKernan, R. M.; Mitchinson, A.; Moore, K. W.; Narquizian, R.; Macaulay, A. J.; Thomas, D.; Thompson, S.-A.; Wafford, K. A.; Castro, J. L. *J. Med. Chem.* **2005**, *48*, 1367.

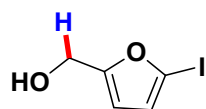

**(5-iodofuran-2-yl)methanol (2ad)**: Shallow yellow liquid (87% yield, 38.9 mg);  $^1\text{H}$  NMR (500 MHz,  $\text{CDCl}_3$ )  $\delta$  6.52 (d,  $J = 3.2$  Hz, 1H), 6.25 (d,  $J = 3.2$  Hz, 1H), 4.63 (s, 2H), 1.90 (s, 1H).  $^{13}\text{C}$  NMR (126 MHz,  $\text{CDCl}_3$ )  $\delta$  159.53 (s), 120.95 (s), 110.87 (s), 87.85 (s), 57.26 (s).

CAS: 773868-46-5

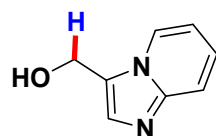

**imidazo[1,2-a]pyridin-3-ylmethanol (2ae)**: light brown solid (78% yield, 23.1 mg).  $^1\text{H}$  NMR (500 MHz,  $\text{CDCl}_3$ )  $\delta$  8.11 – 8.03 (m, 1H), 7.56 (d,  $J = 9.0$  Hz, 2H), 7.16 (ddd,  $J = 9.3, 6.8, 1.2$  Hz, 1H), 6.77 (dt,  $J = 7.6, 3.8$  Hz, 1H), 4.86 (s, 2H).  $^{13}\text{C}$  NMR (126 MHz,  $\text{CDCl}_3$ )  $\delta$  146.88 (s), 145.31 (s), 125.74 (s), 124.80 (s), 117.24 (s), 112.36 (s), 109.56 (s), 58.50 (s).

Chandra Mohan, D.; Nageswara Rao, S.; Adimurthy, S. *J. Org. Chem.* **2013**, *78*, 1266.

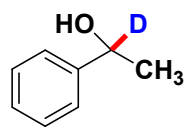

**1-phenylethanol-1-d<sub>1</sub>-ol (4)** shallow yellow oil (90% yield, 22.1 mg);  
<sup>1</sup>H NMR (500 MHz, CDCl<sub>3</sub>) δ 7.40 (dd, *J* = 9.4, 7.0 Hz, 4H), 7.31 (d, *J* = 6.9 Hz, 1H), 1.89 (s, 1H), 1.52 (s, 3H). <sup>13</sup>C NMR (126 MHz, CDCl<sub>3</sub>) δ 145.73 (s), 128.52 (s), 127.50 (s), 125.39 (s), 25.04 (s).

Li, C.; Zhang, Y.; Sun, Q.; Gu, T.; Peng, H.; Tang, W. *J. Am. Chem. Soc.* **2016**, *138*, 10774.

## V. $^1\text{H}$ and $^{13}\text{C}$ NMR spectra of products

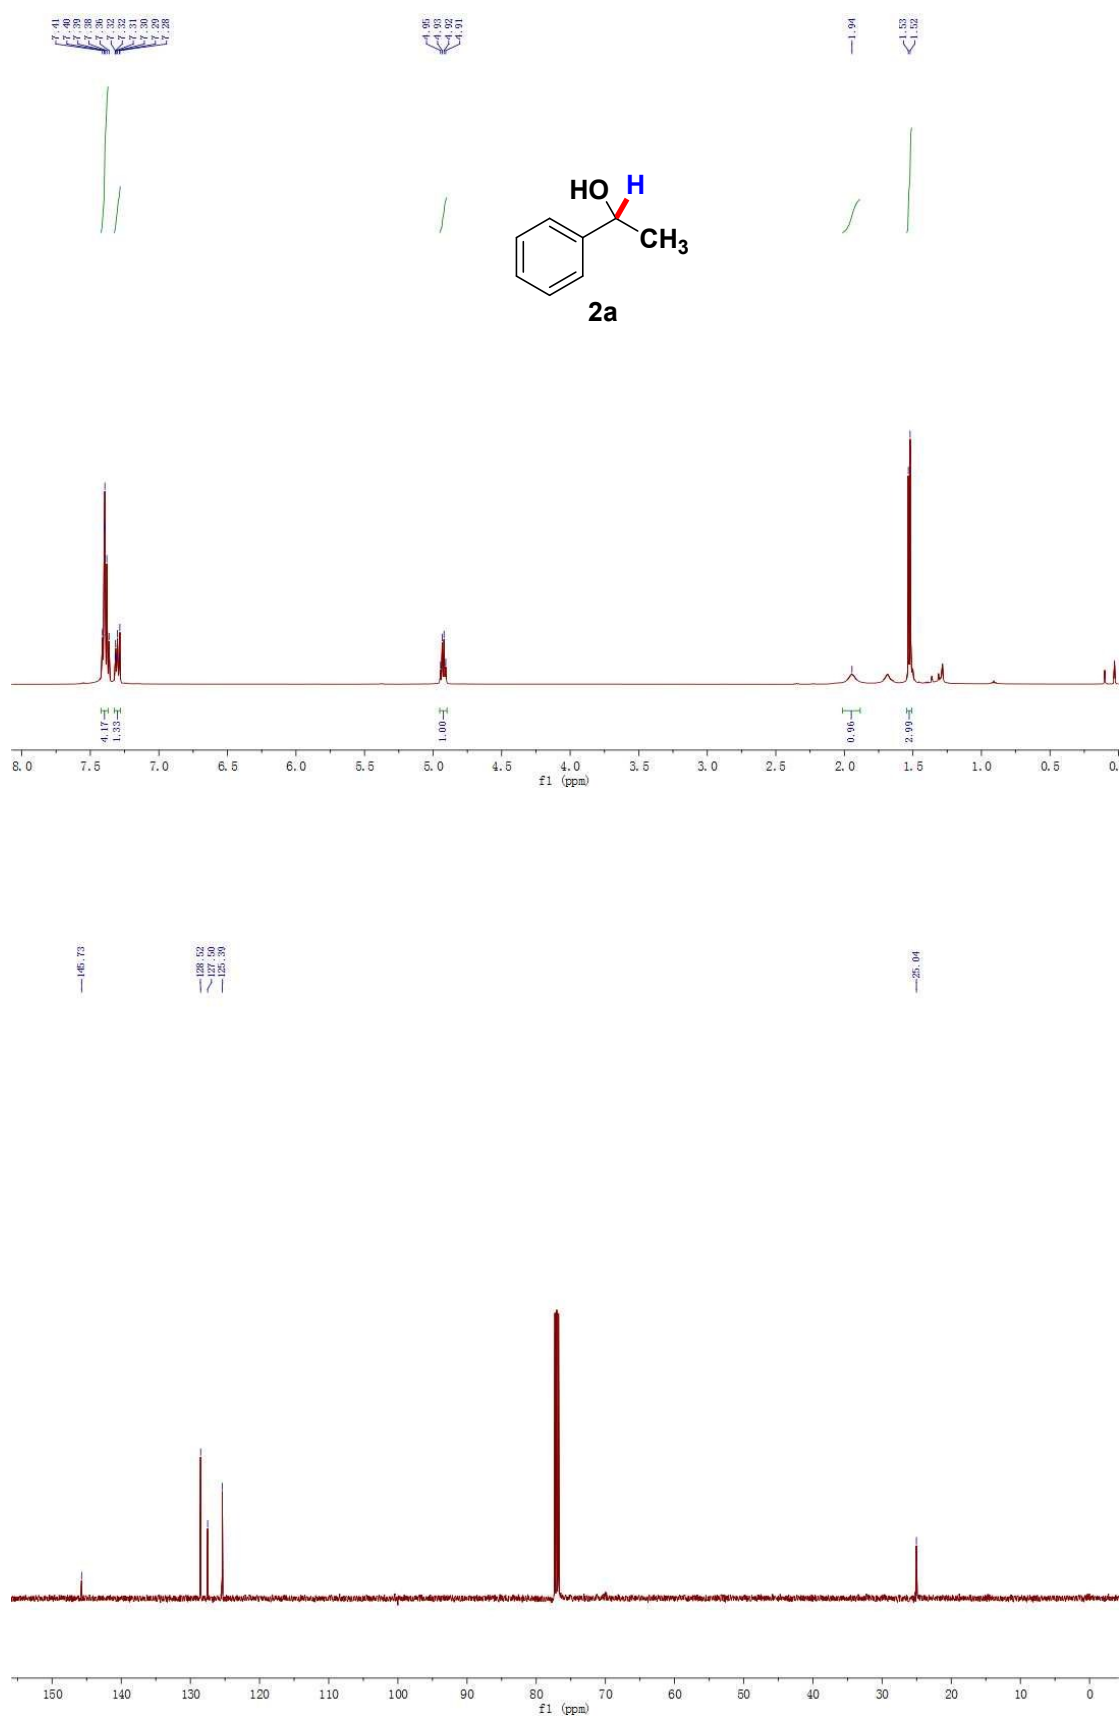

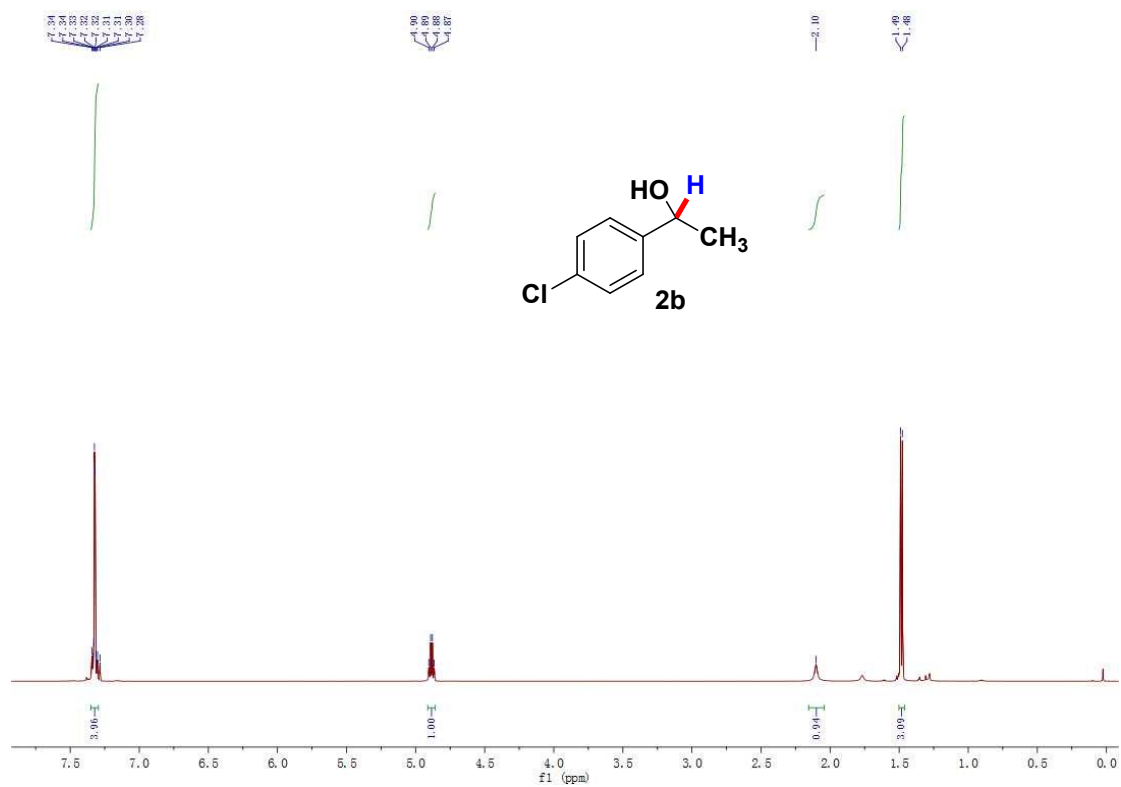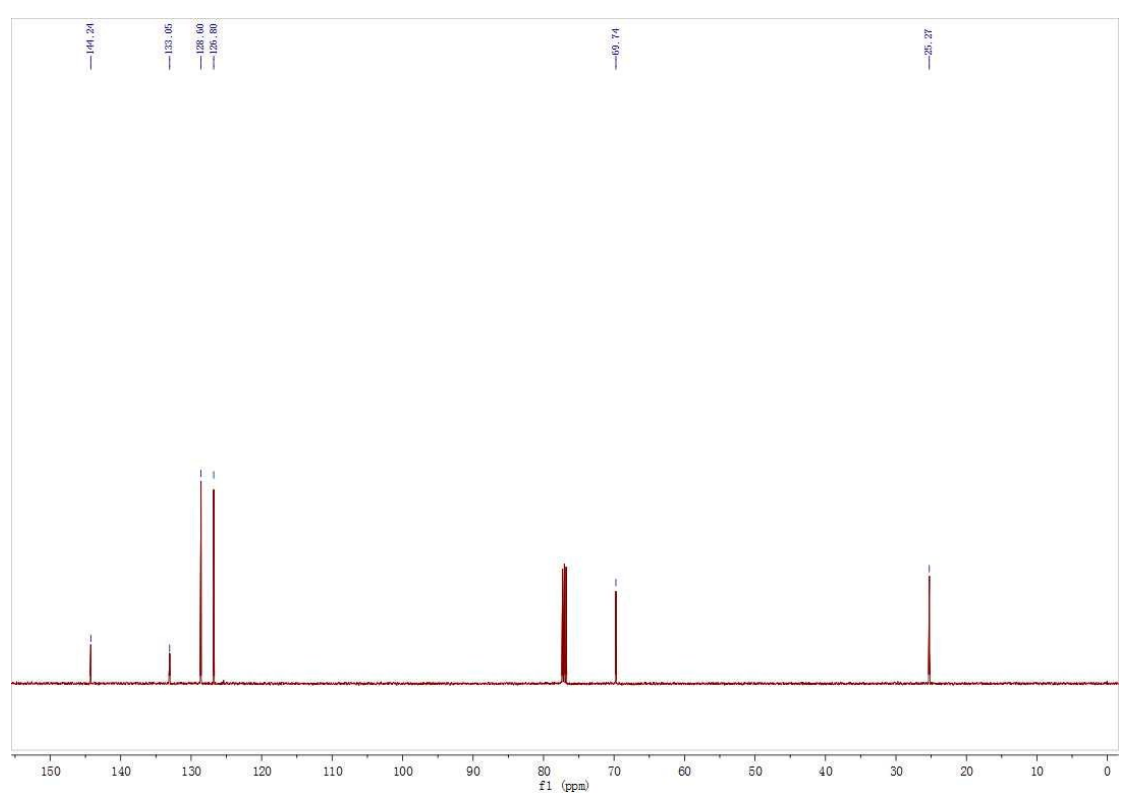

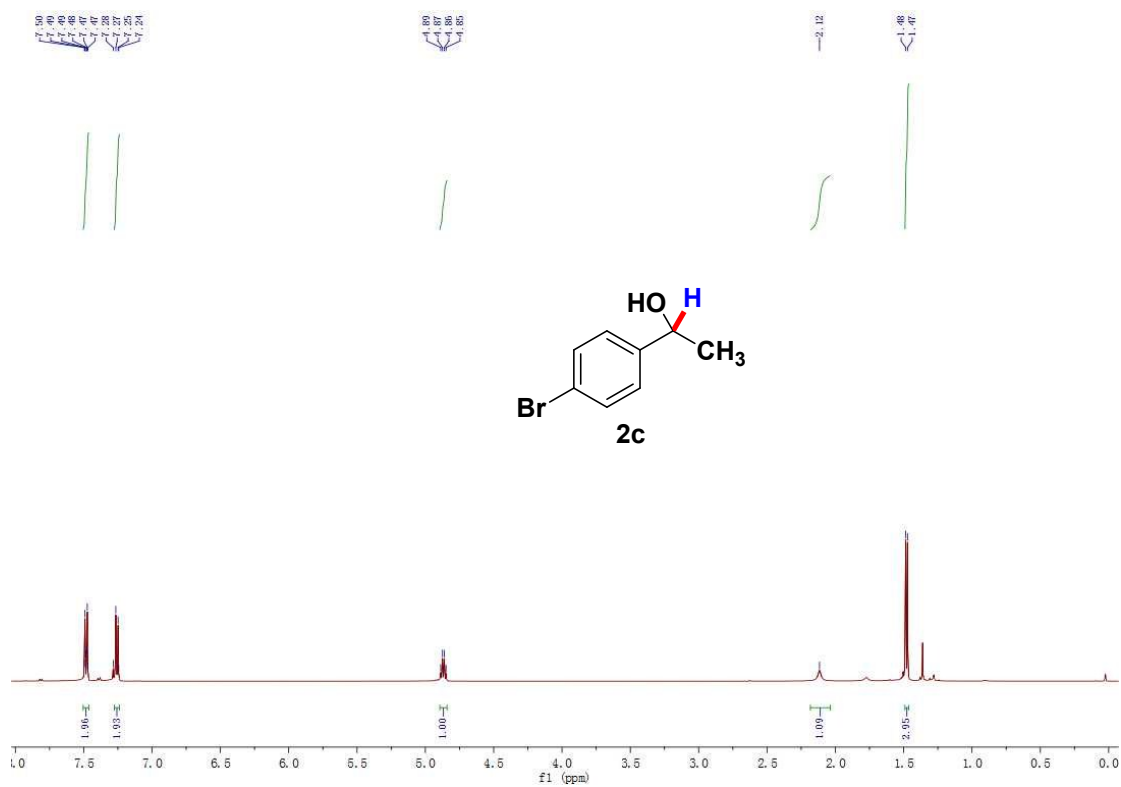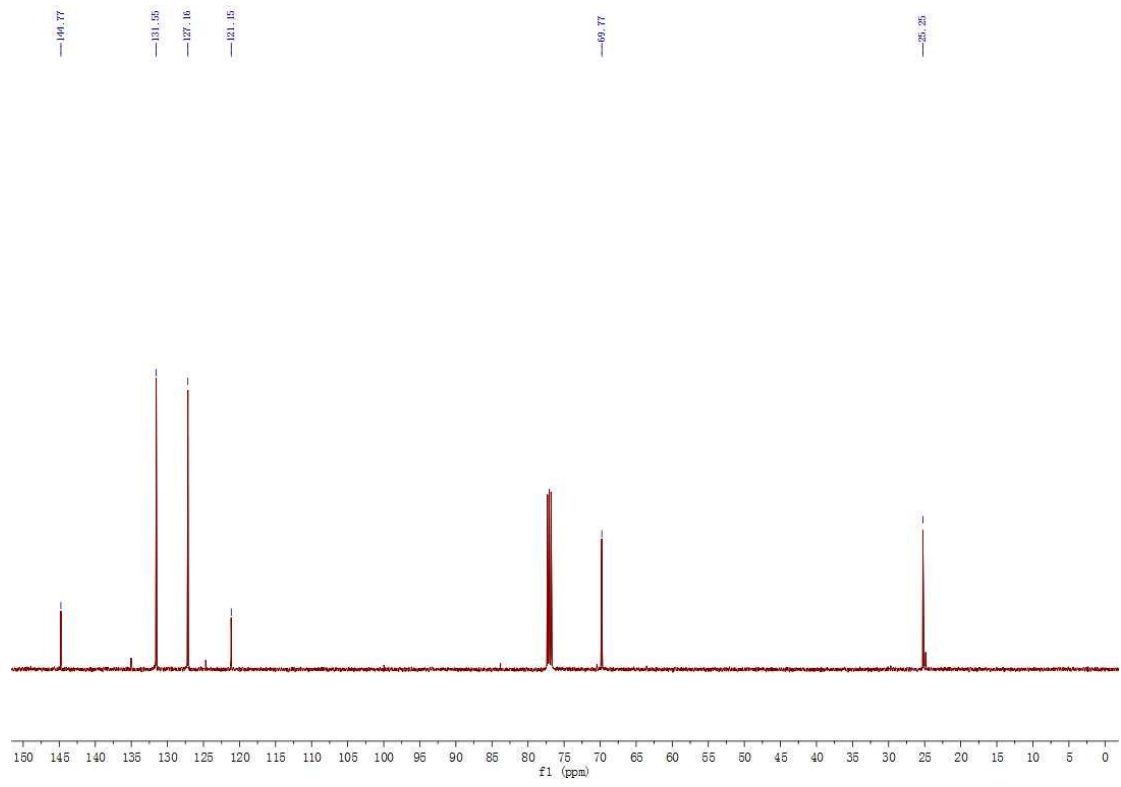





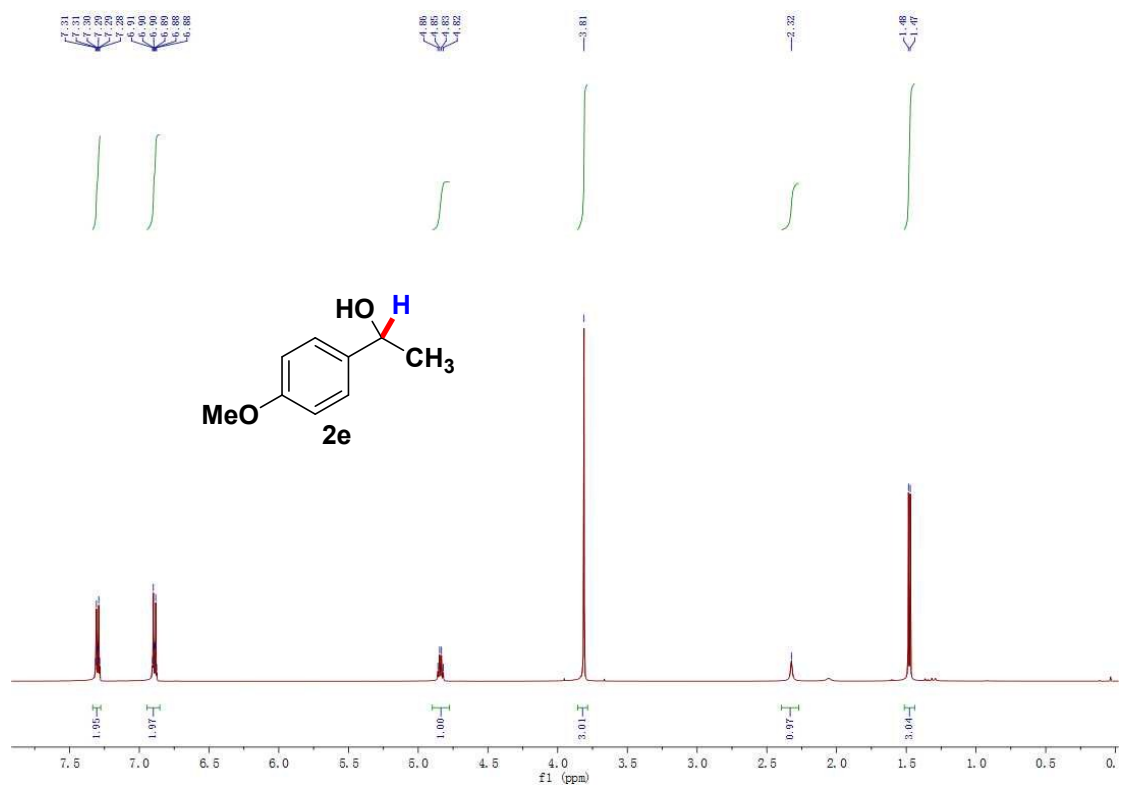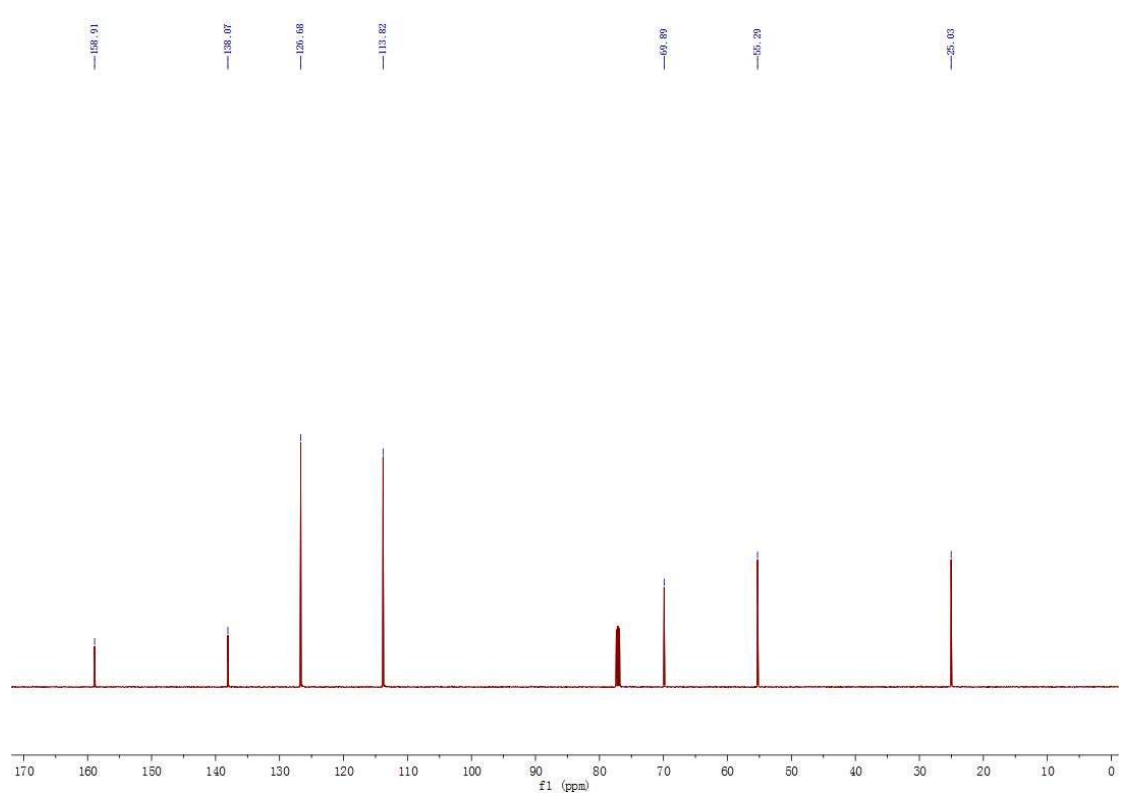

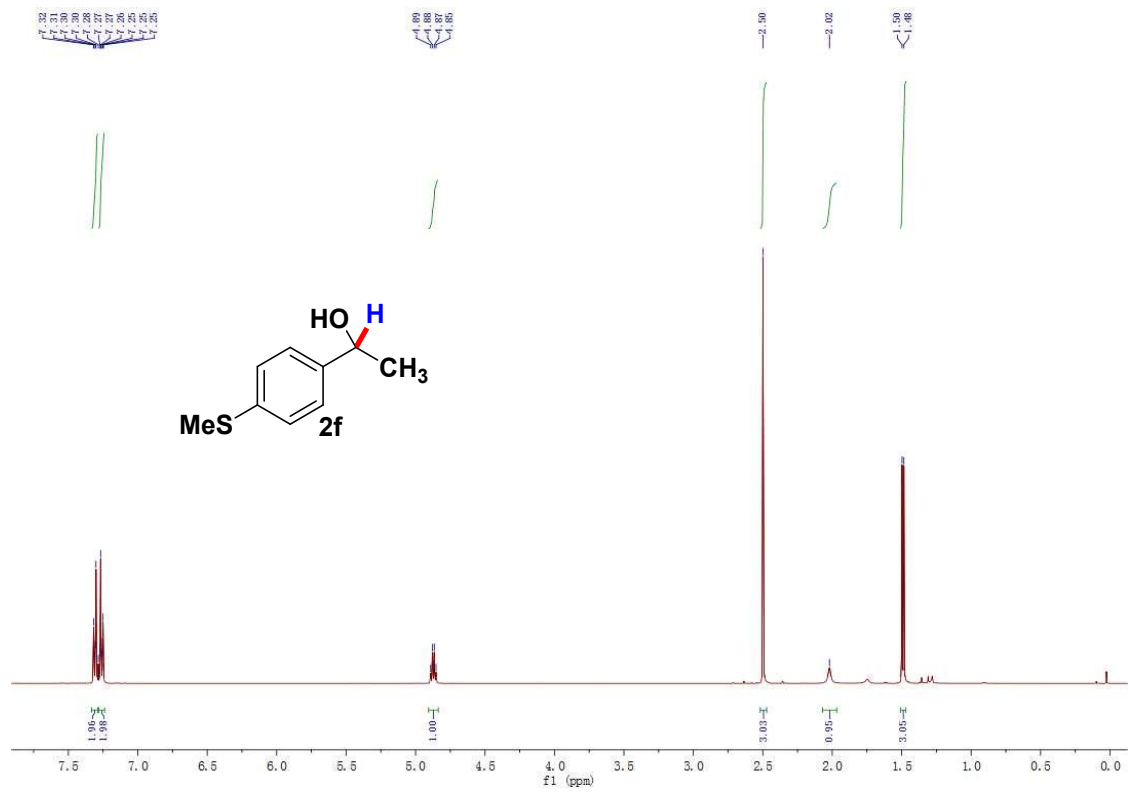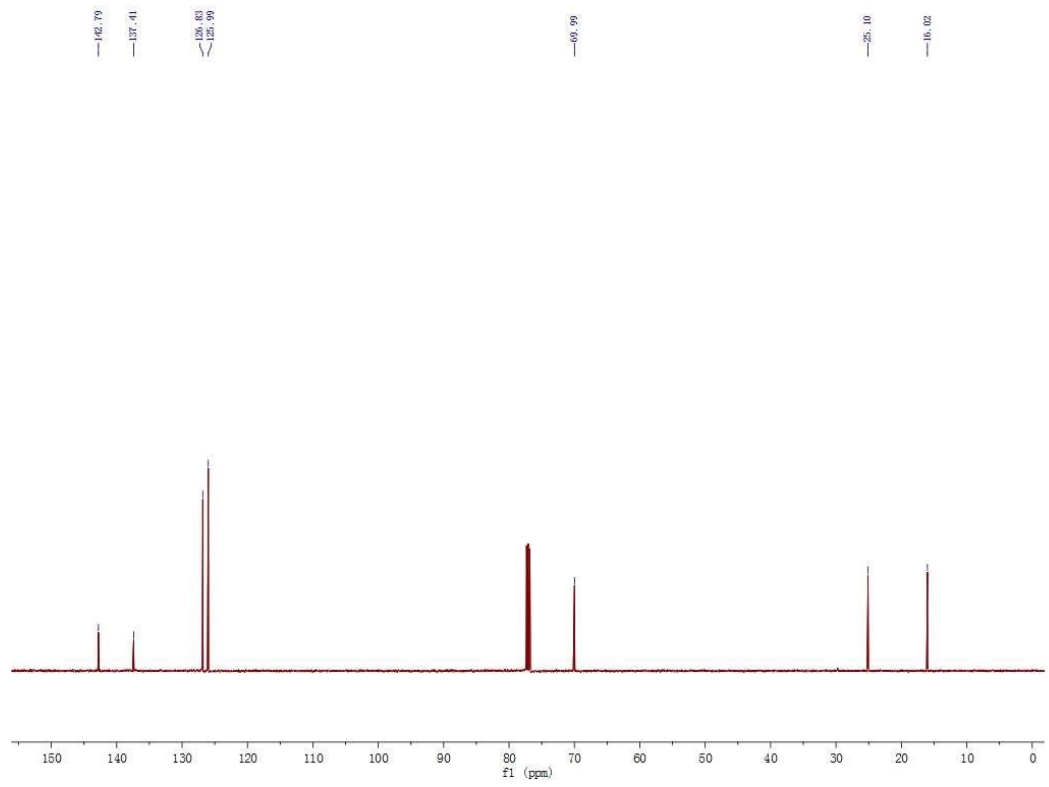

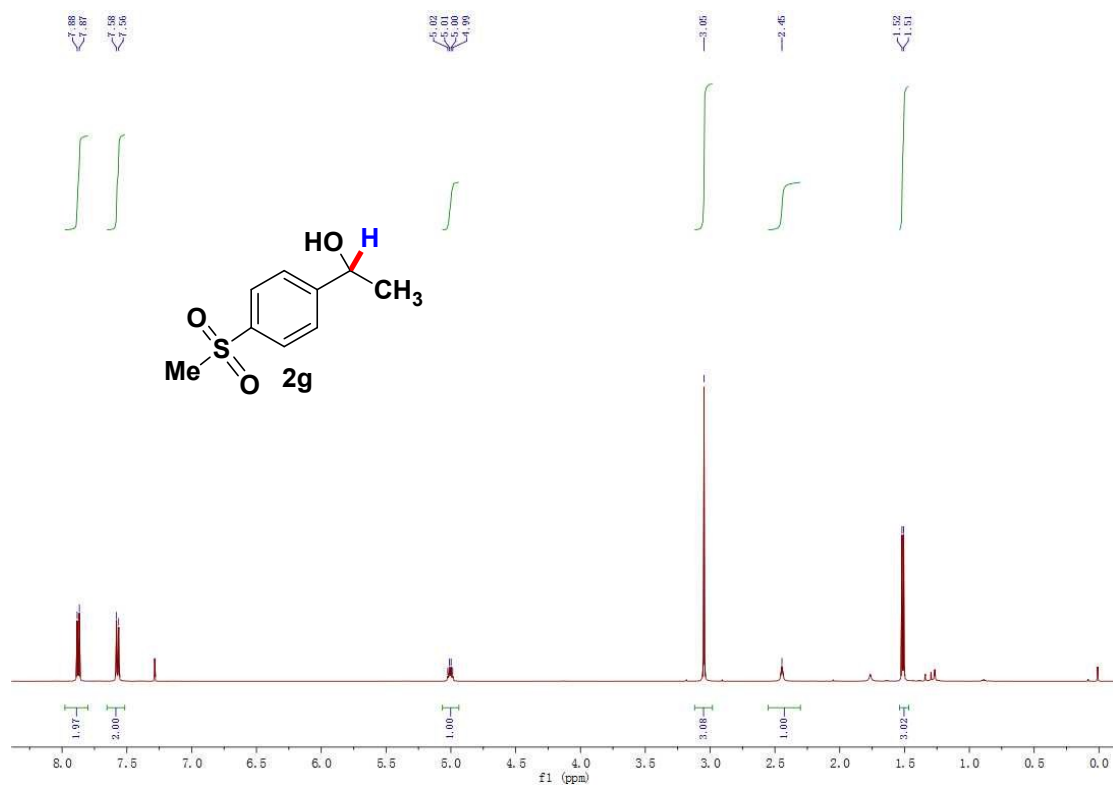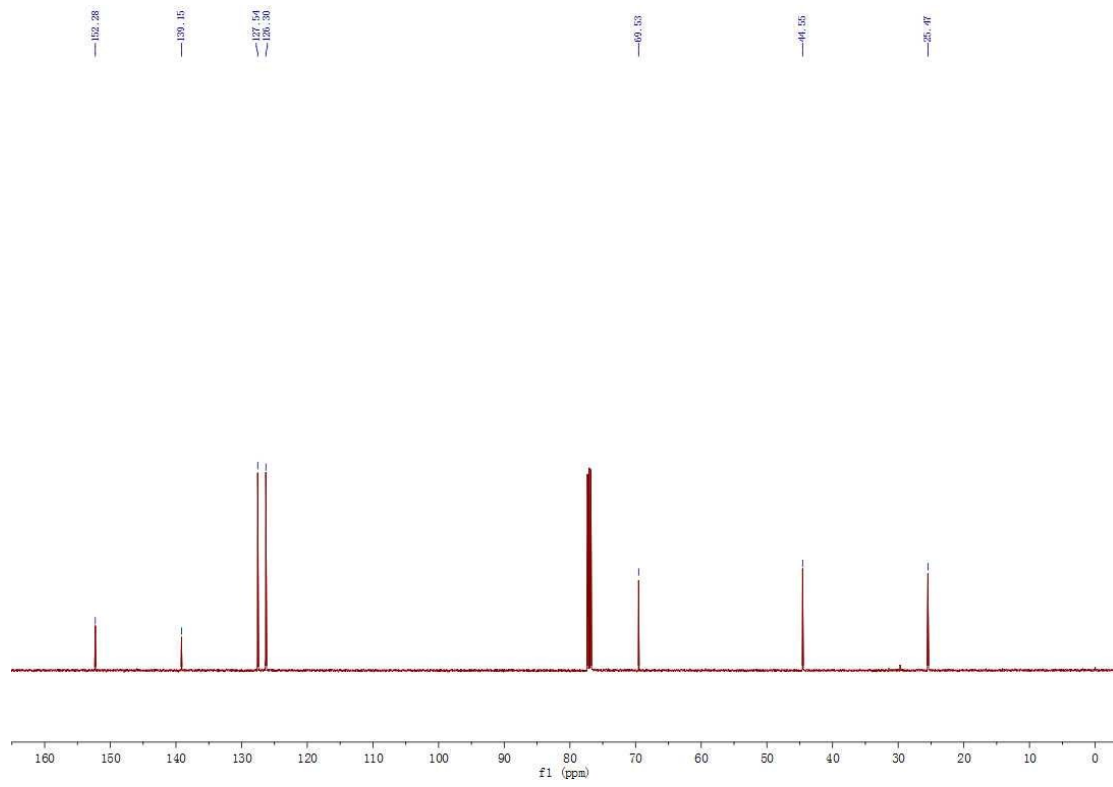

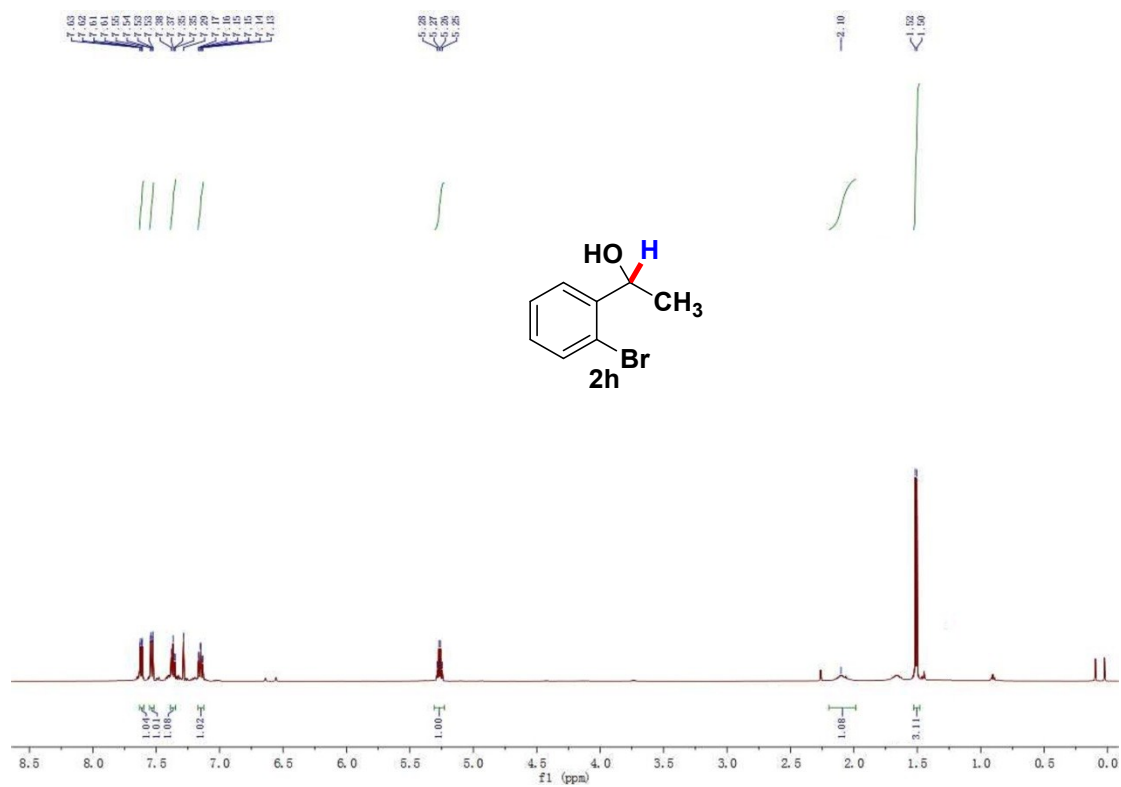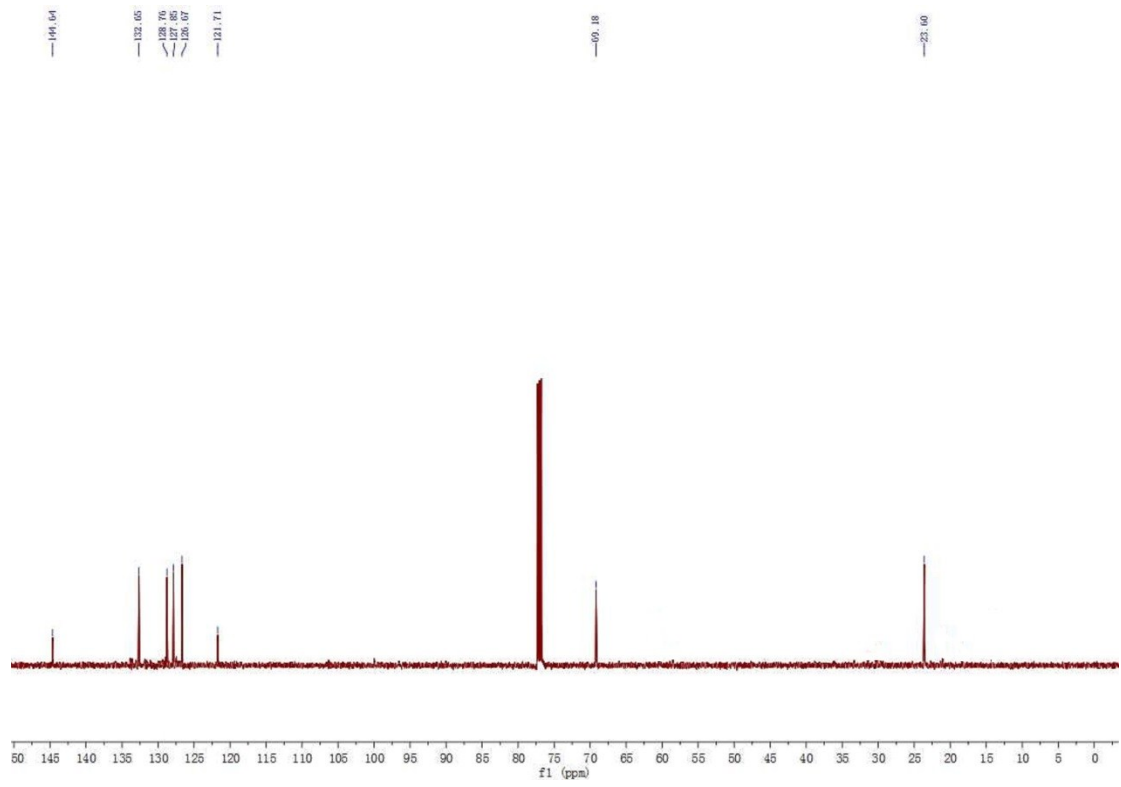

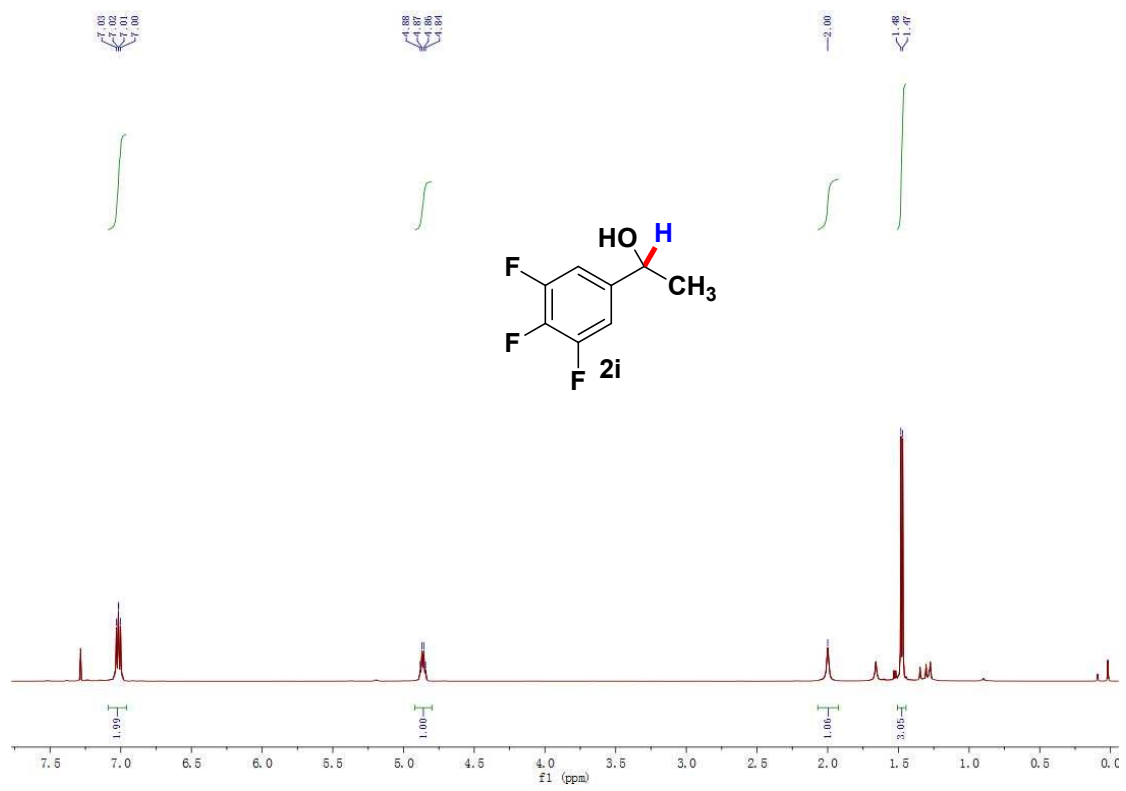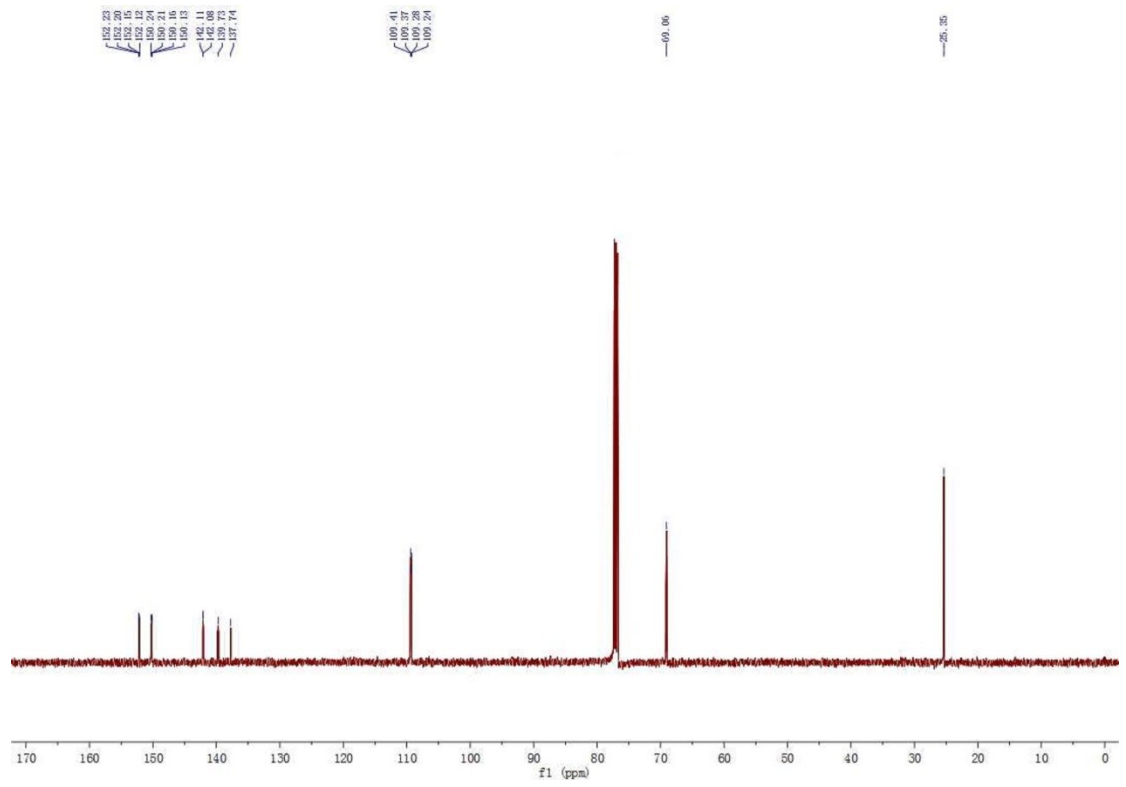

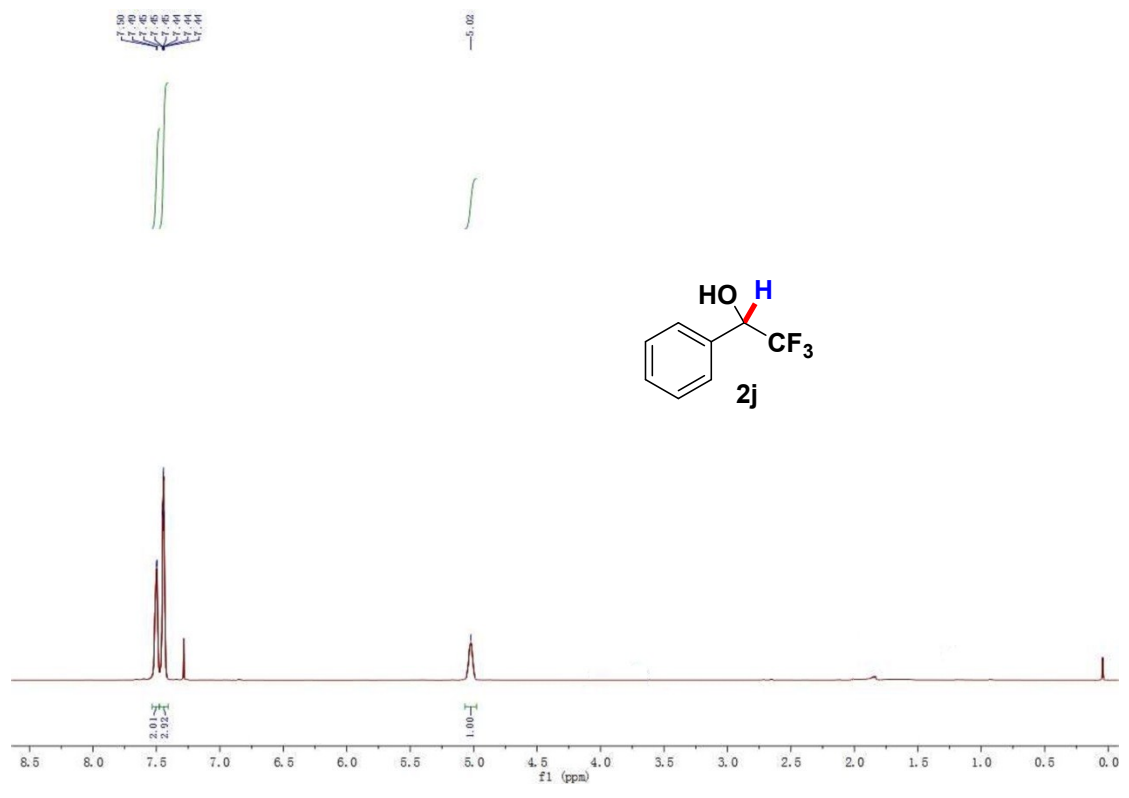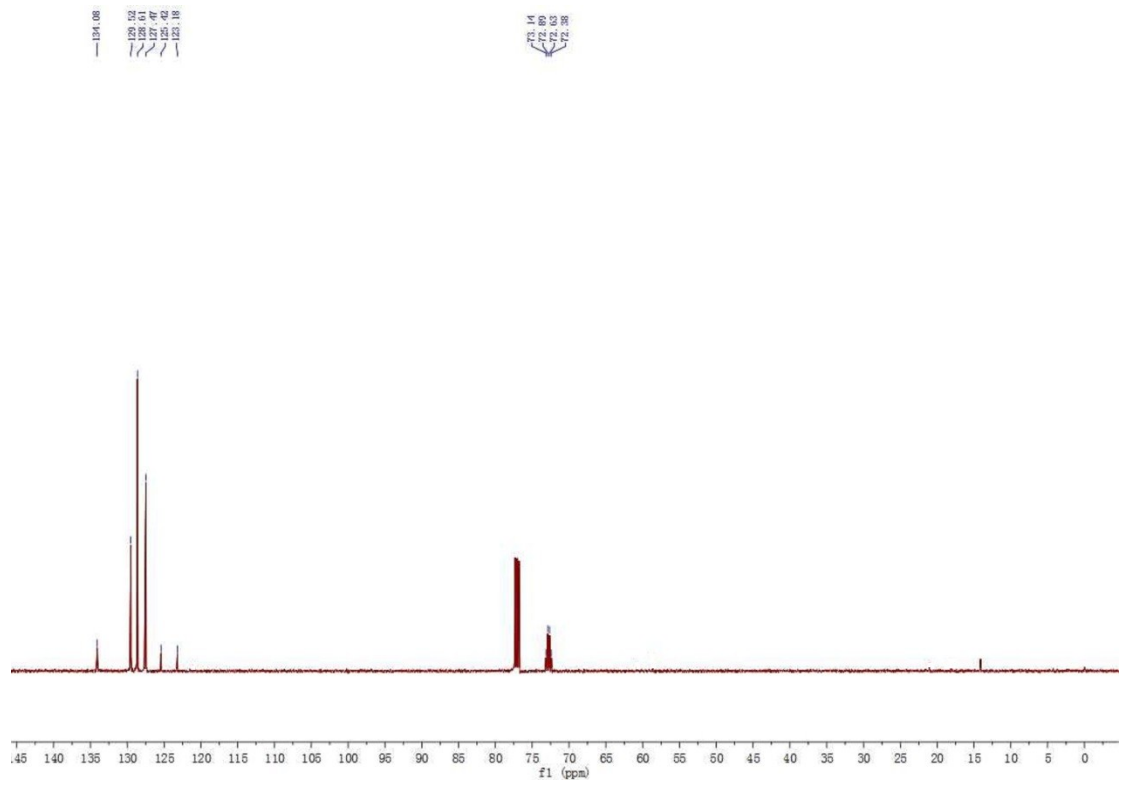

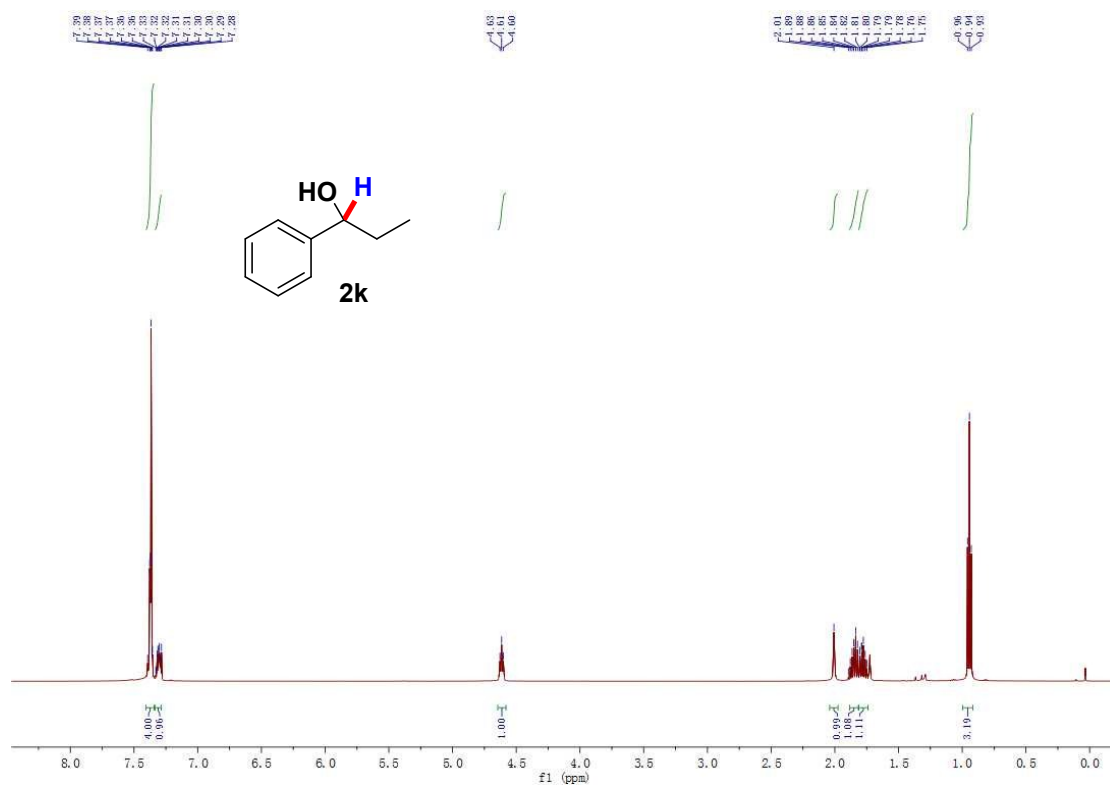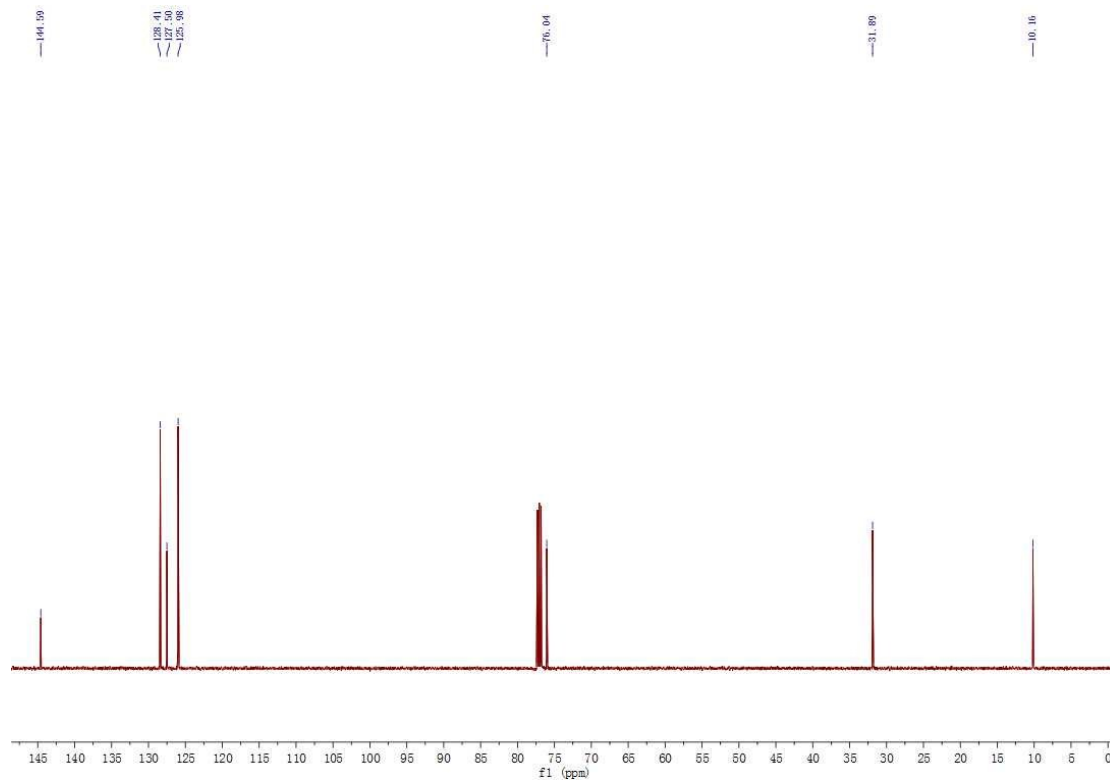



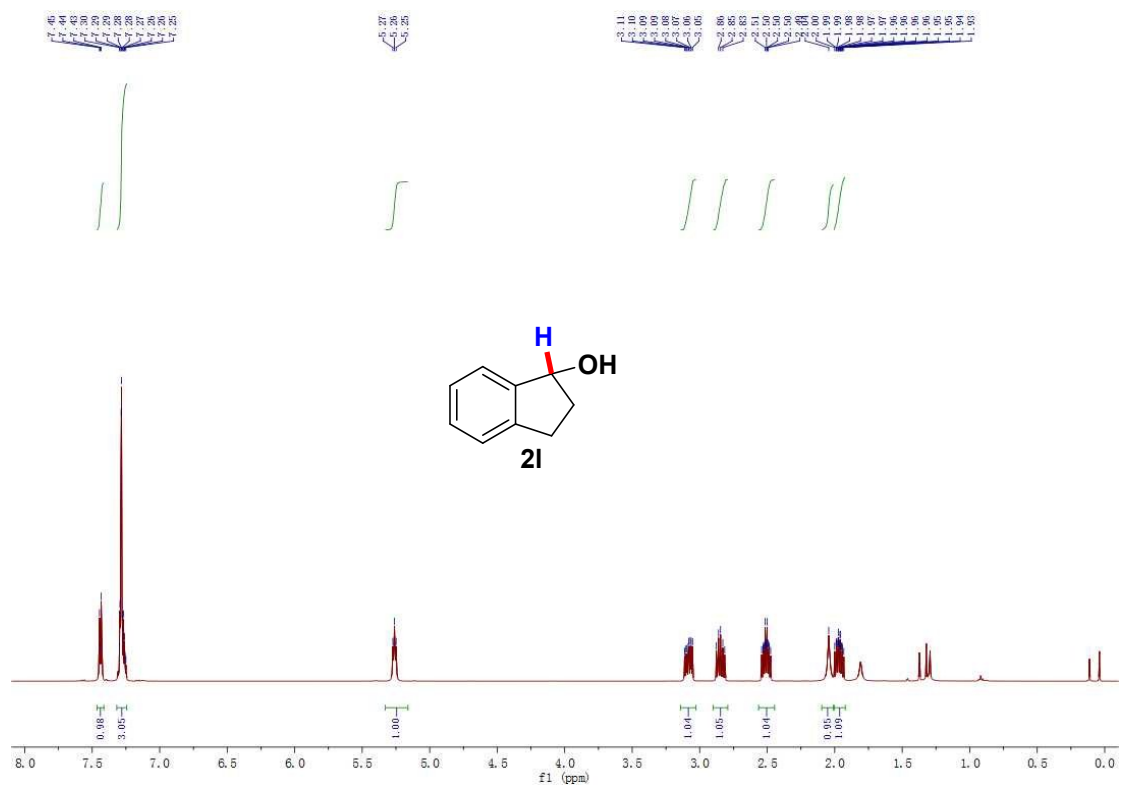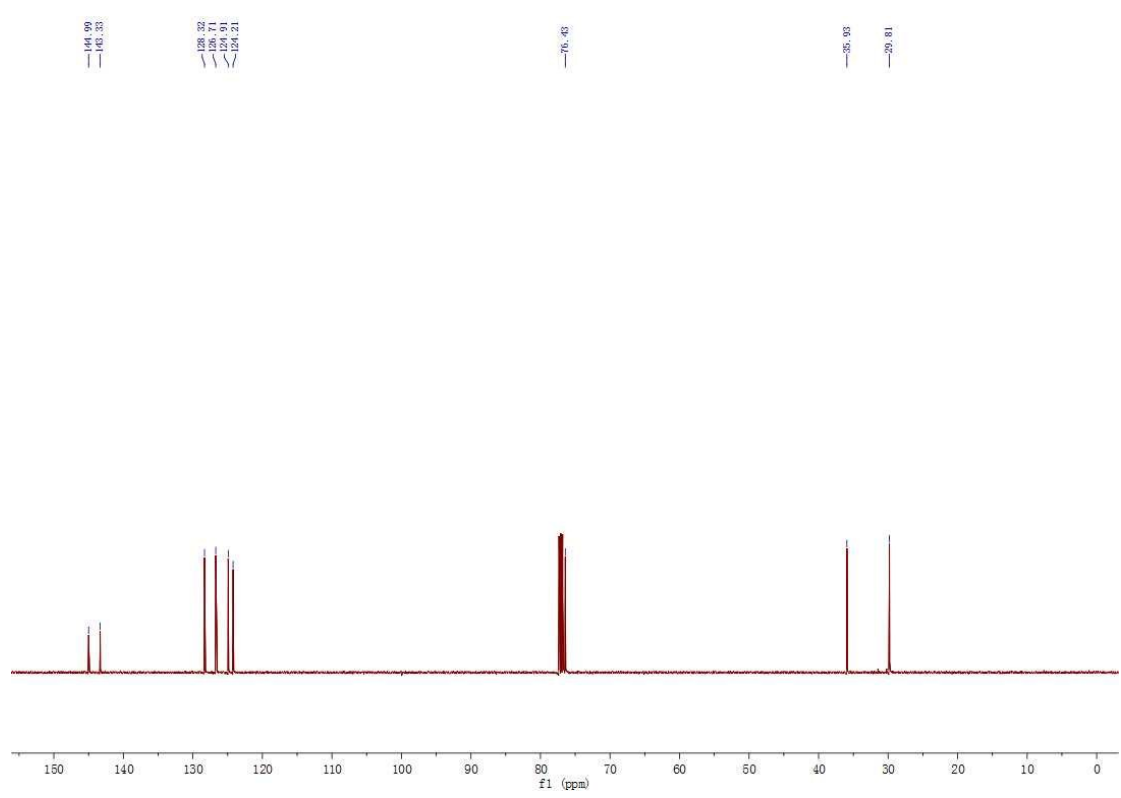



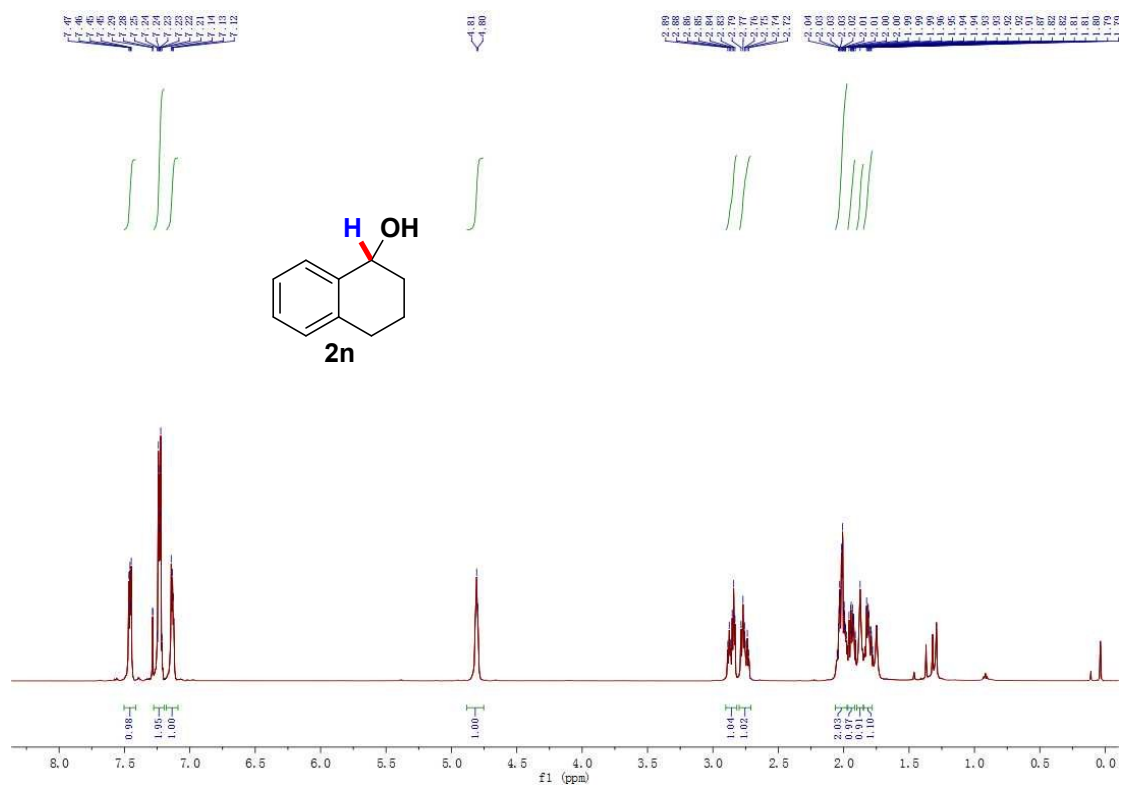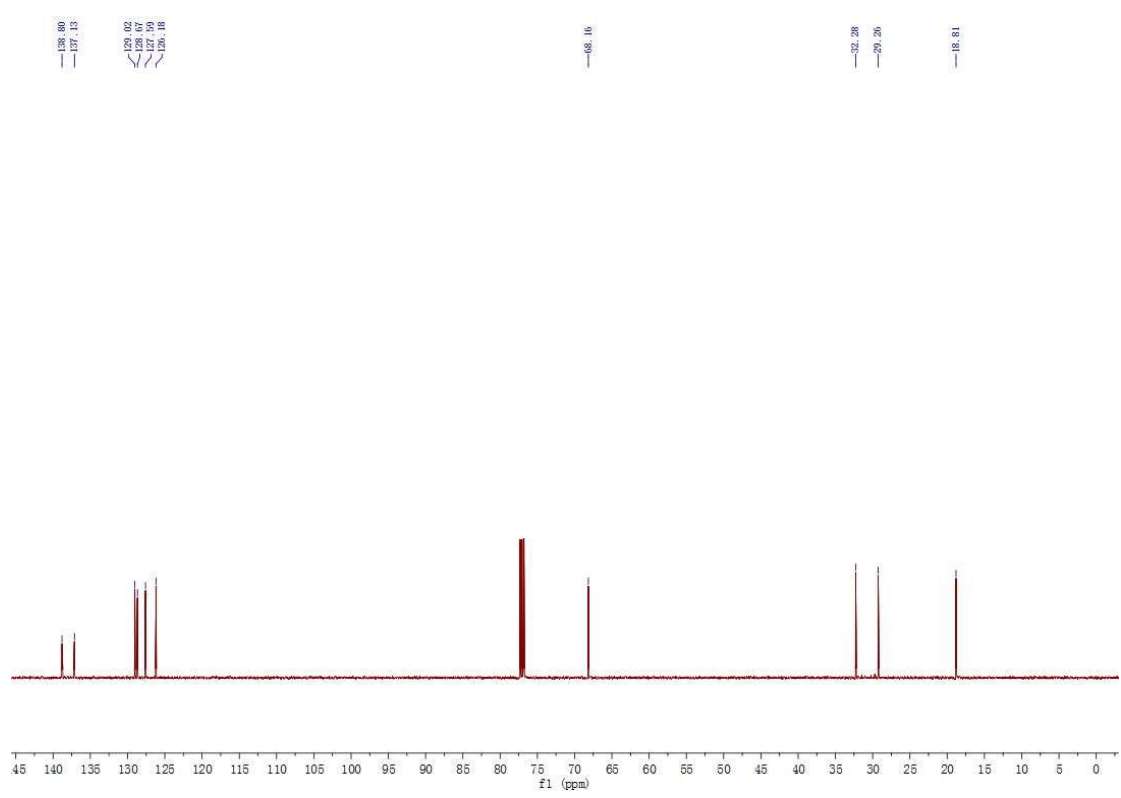

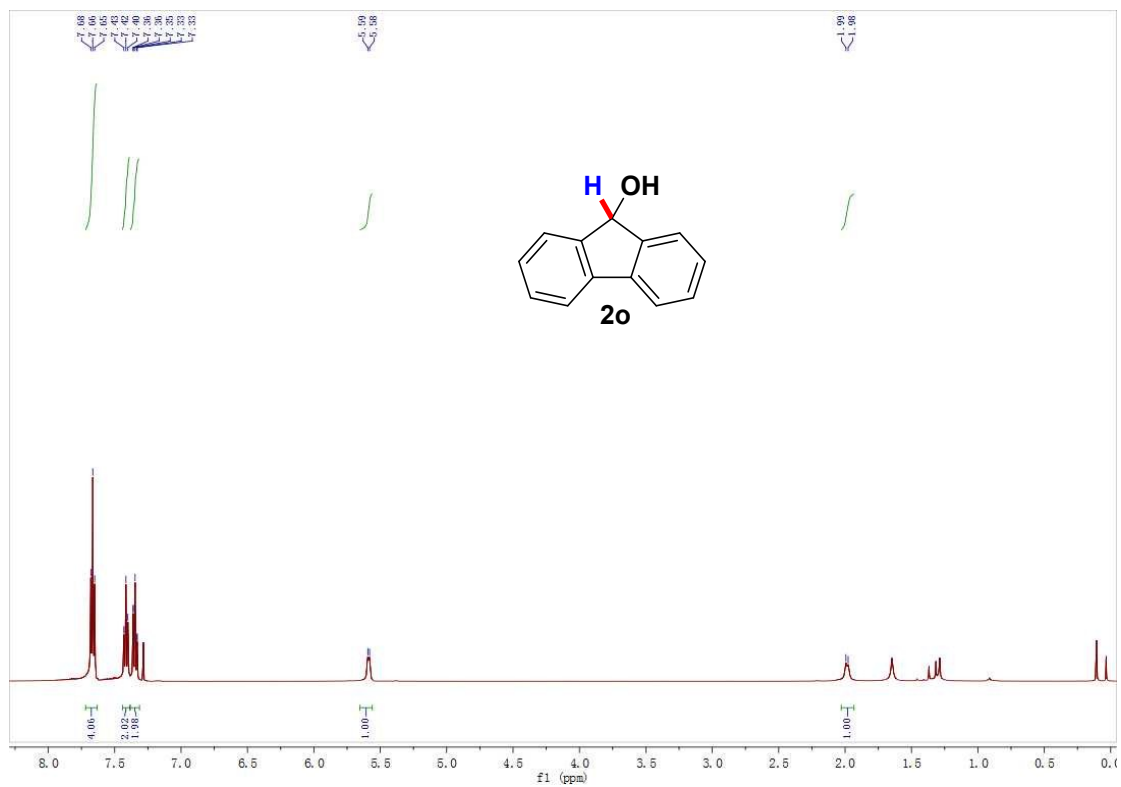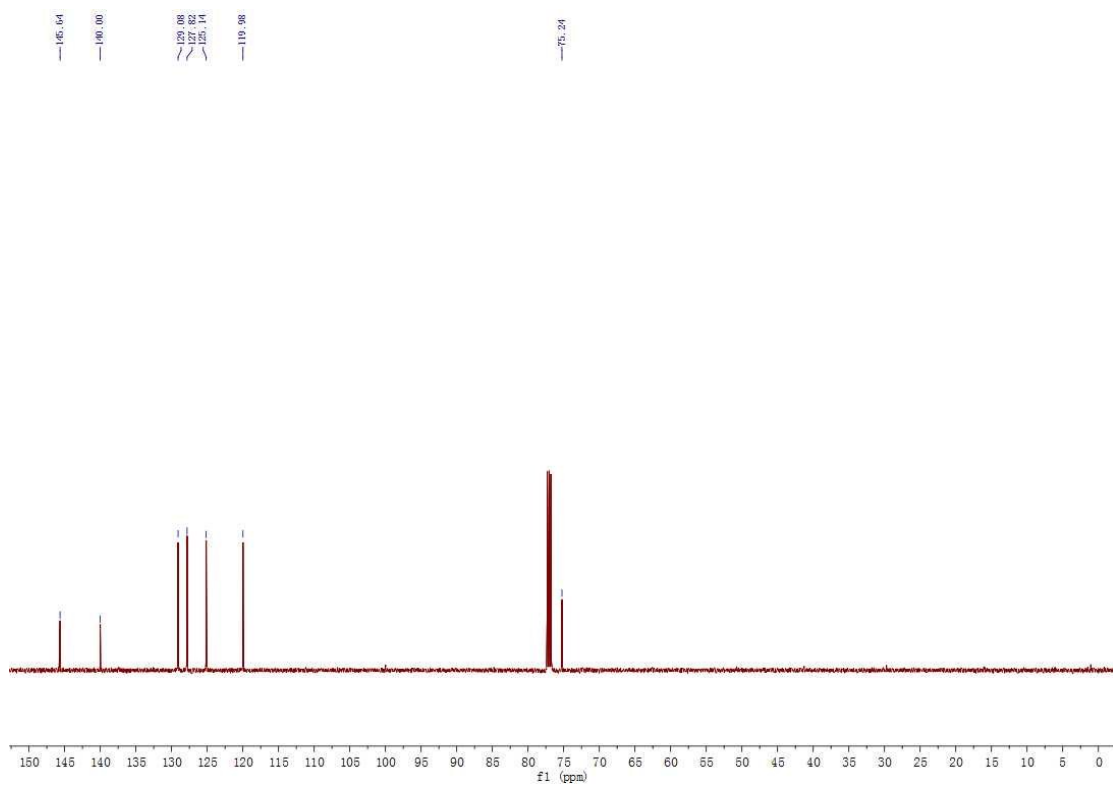

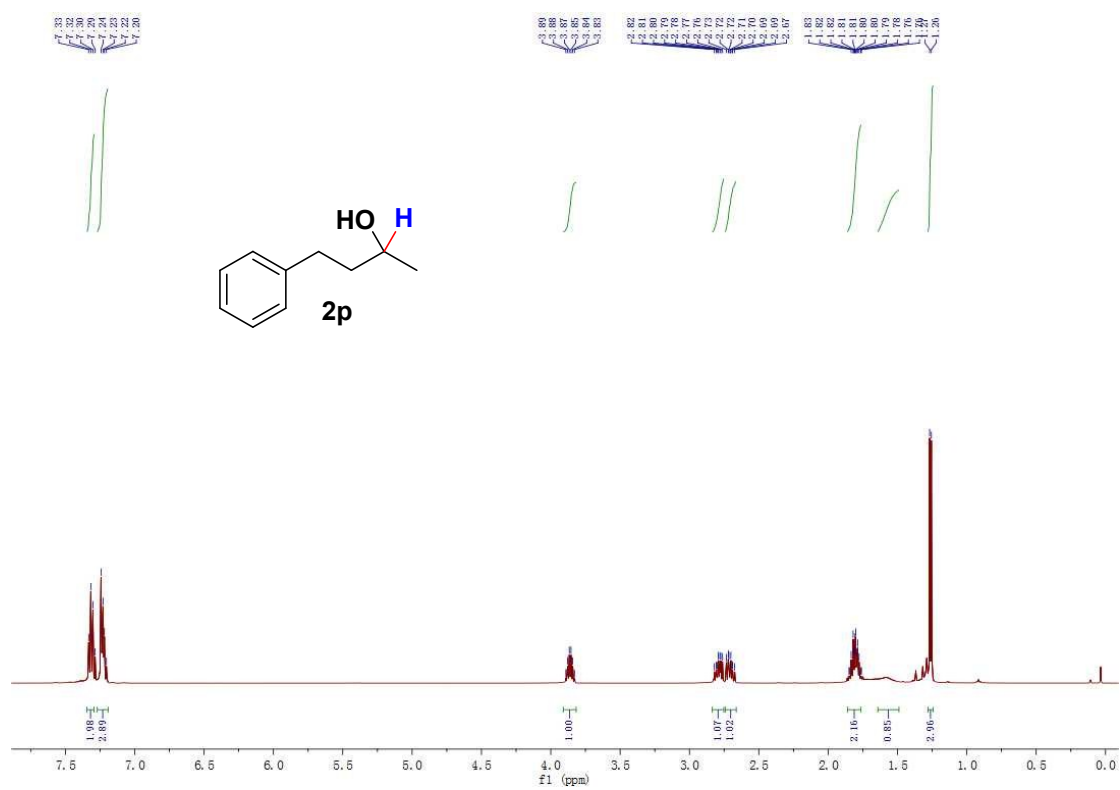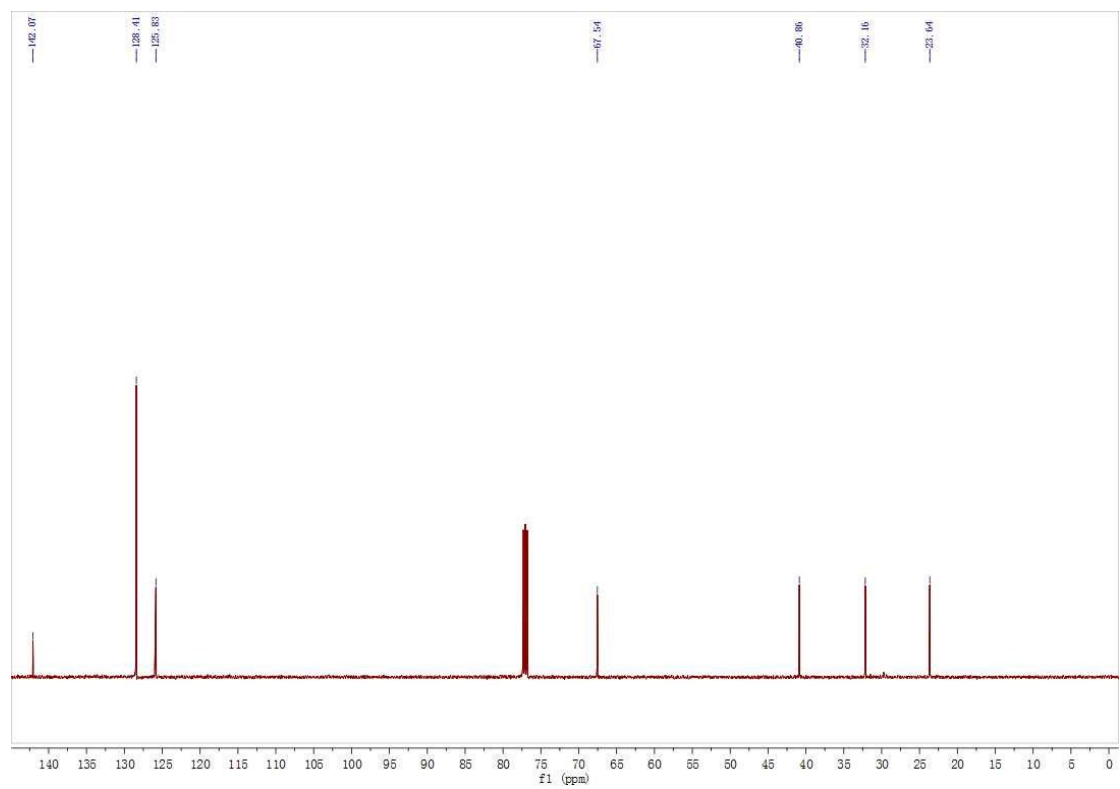

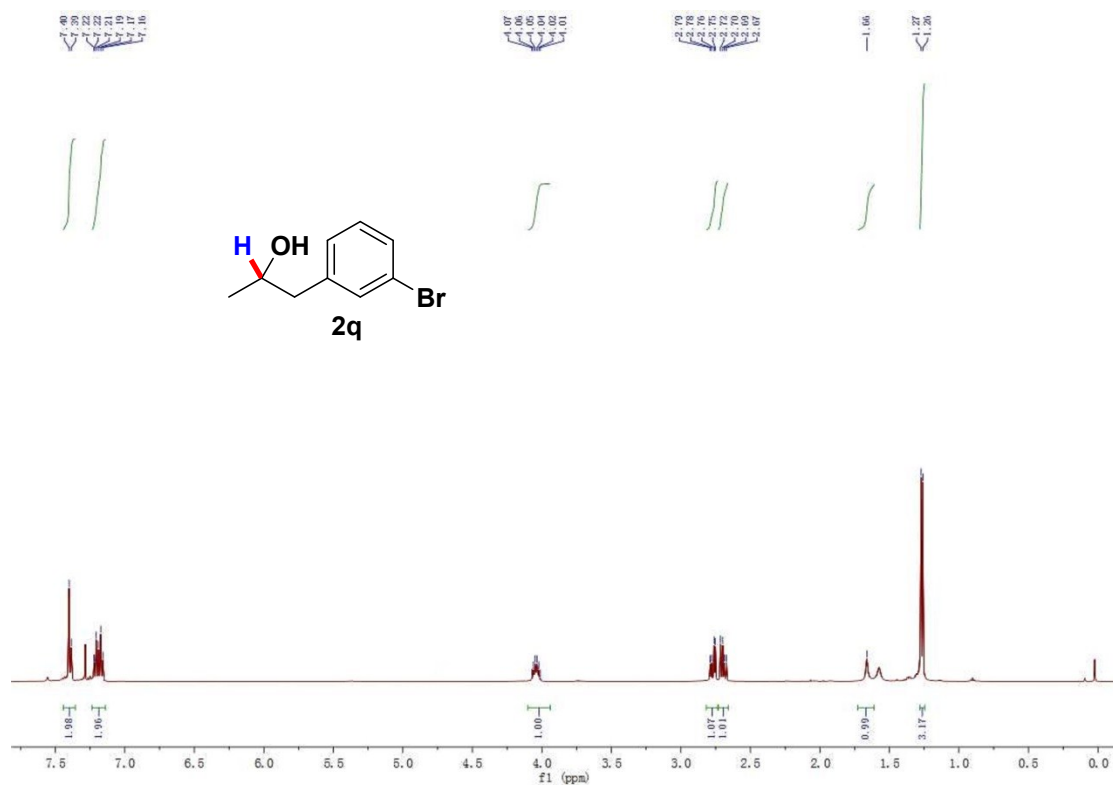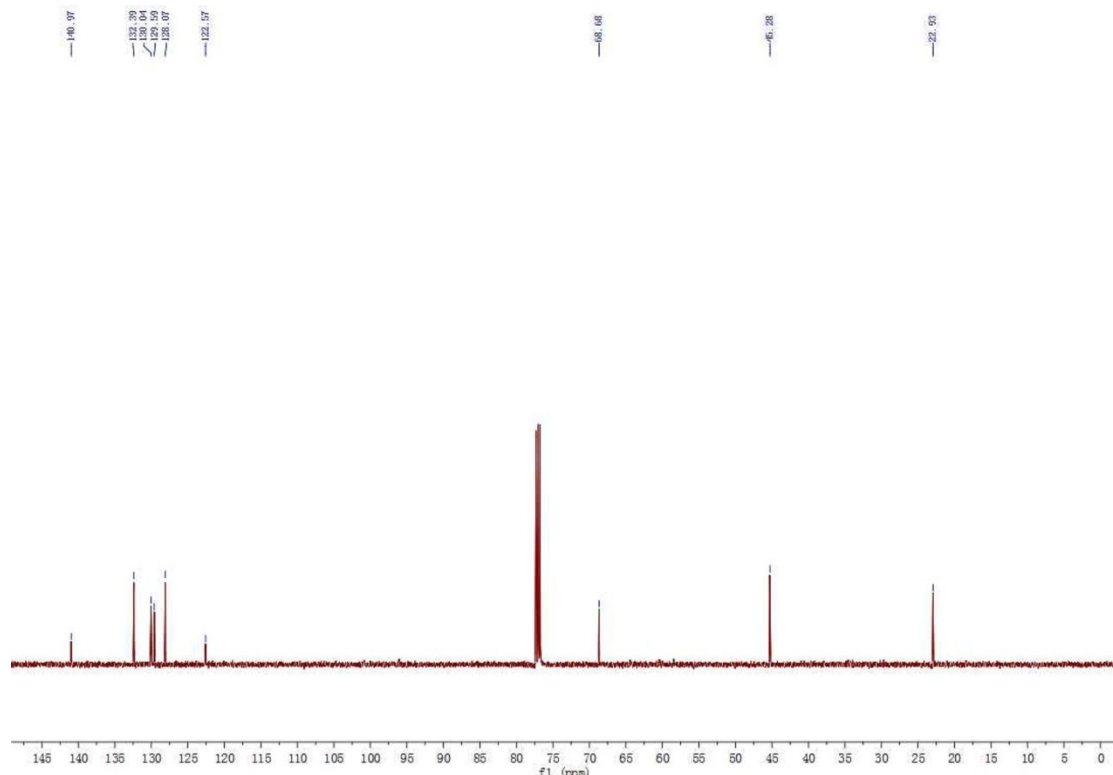

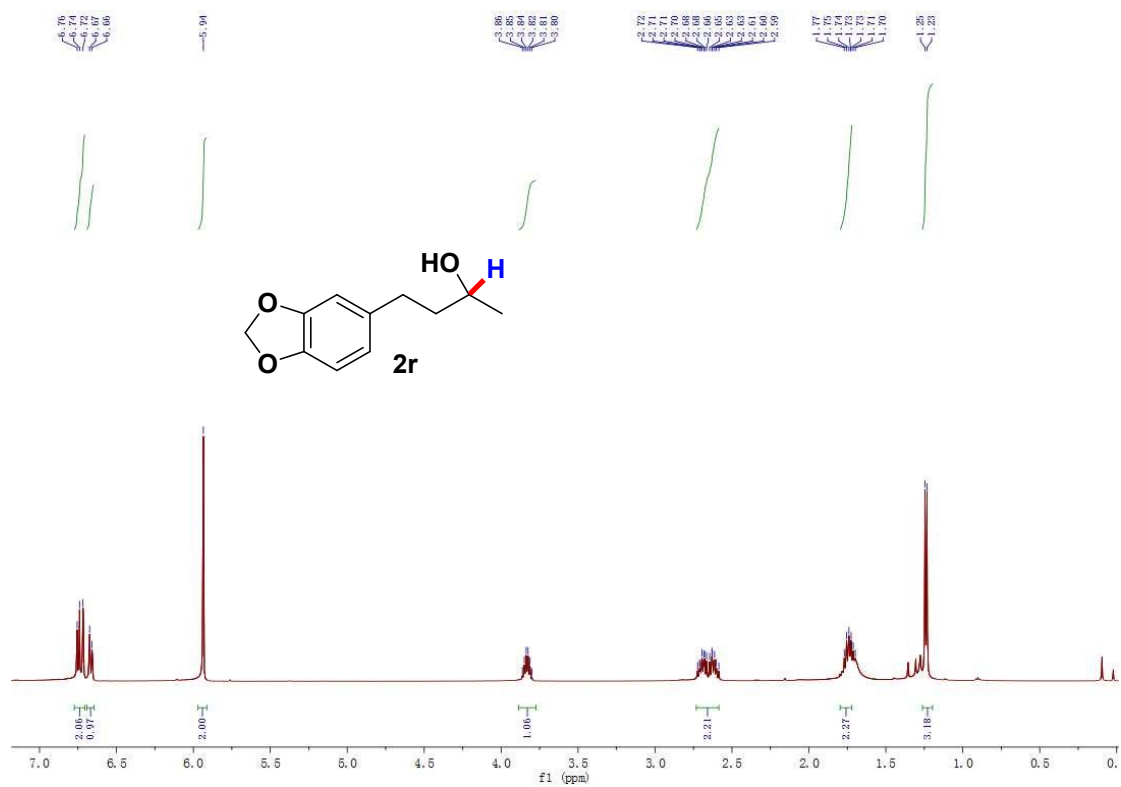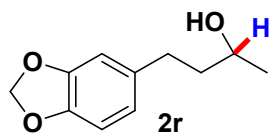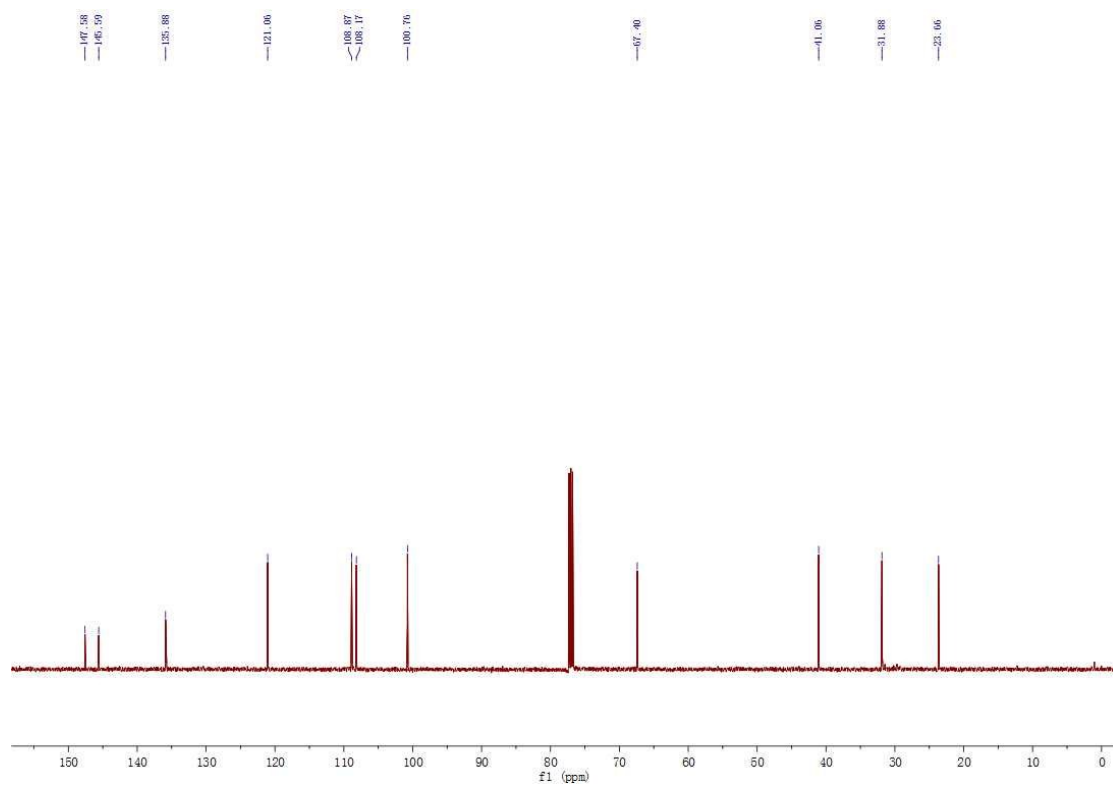

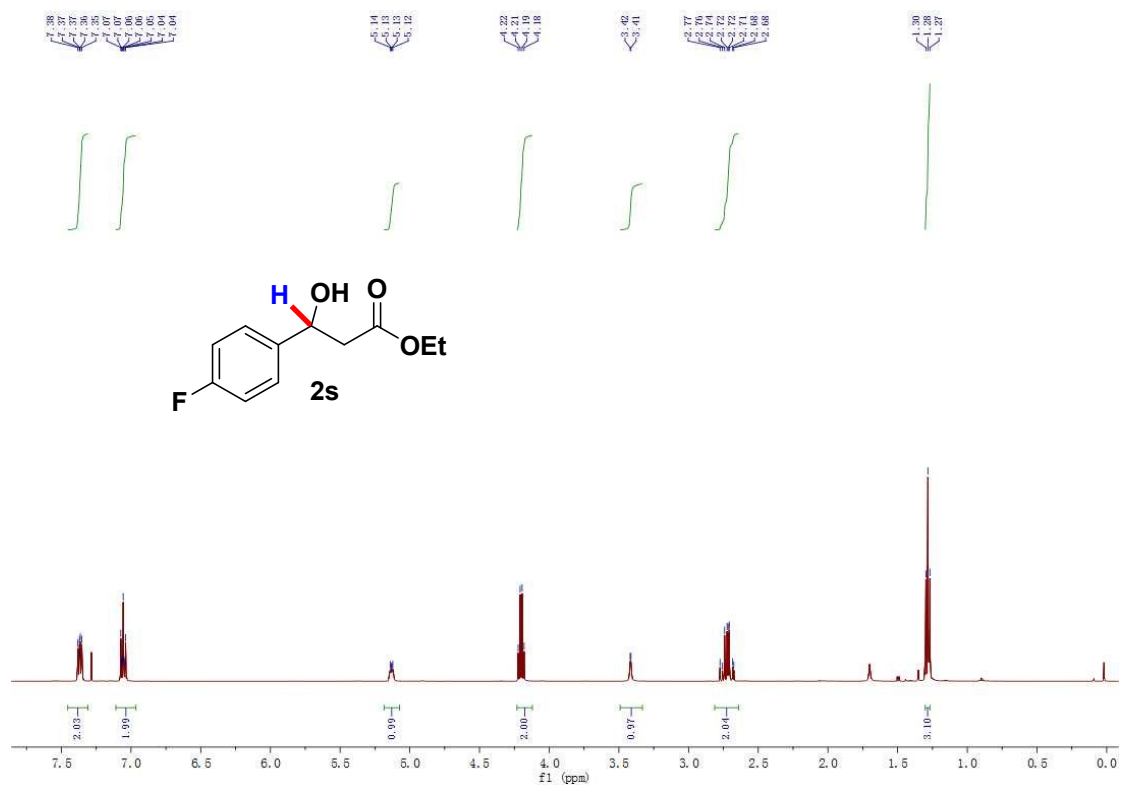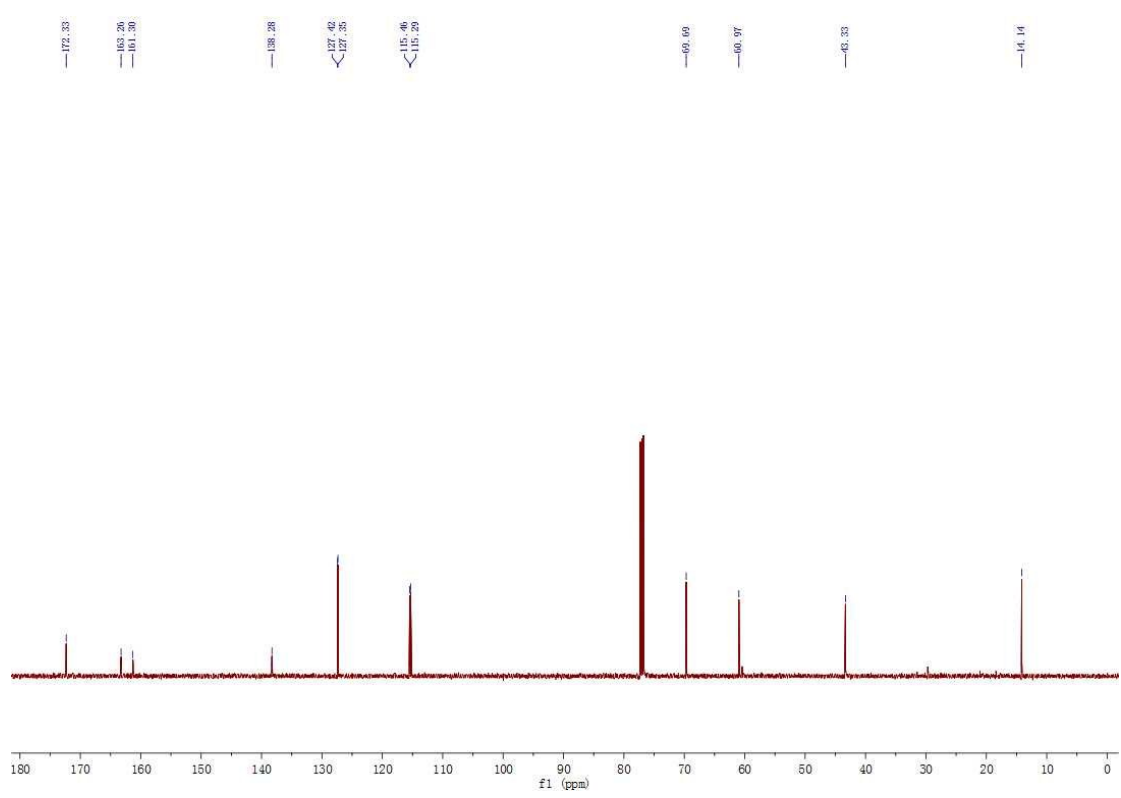



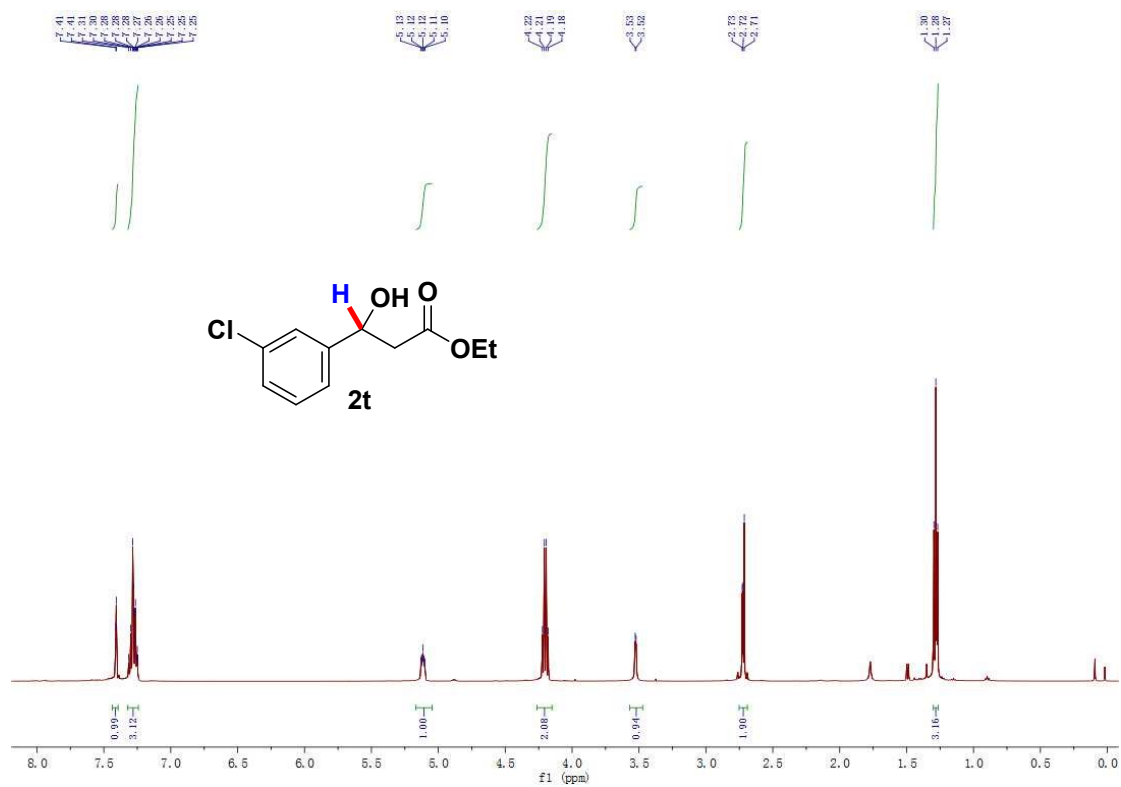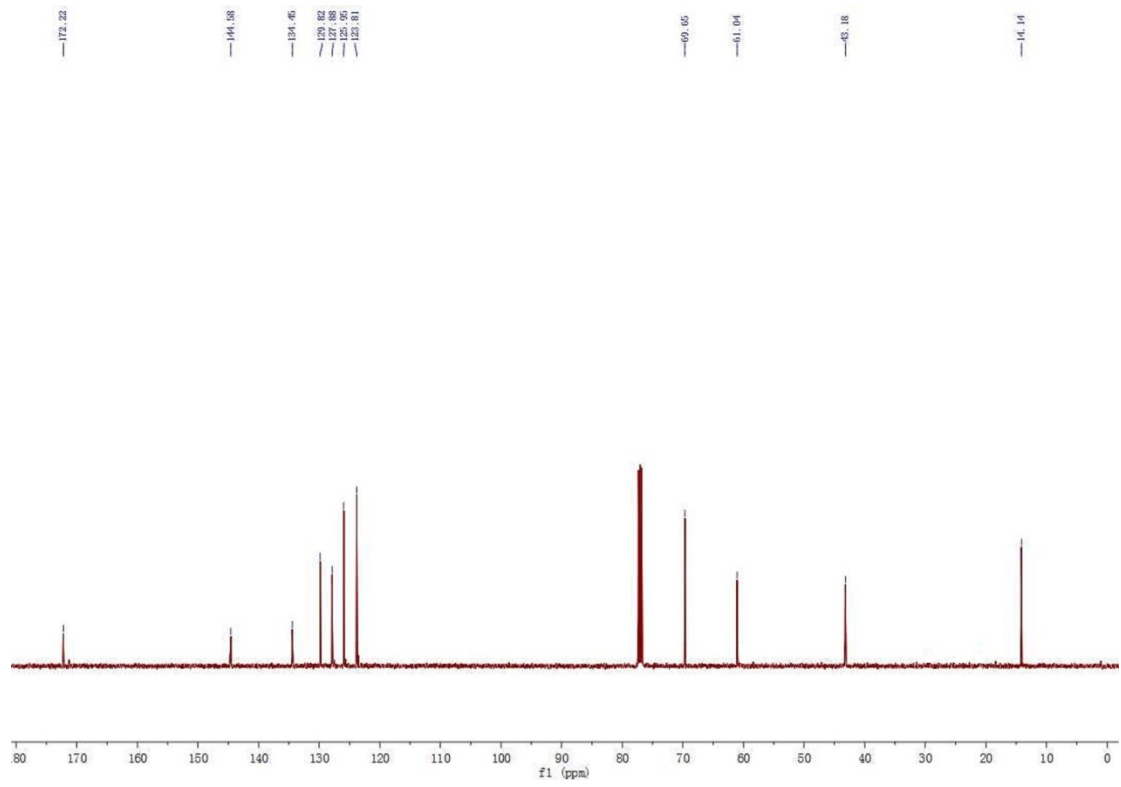

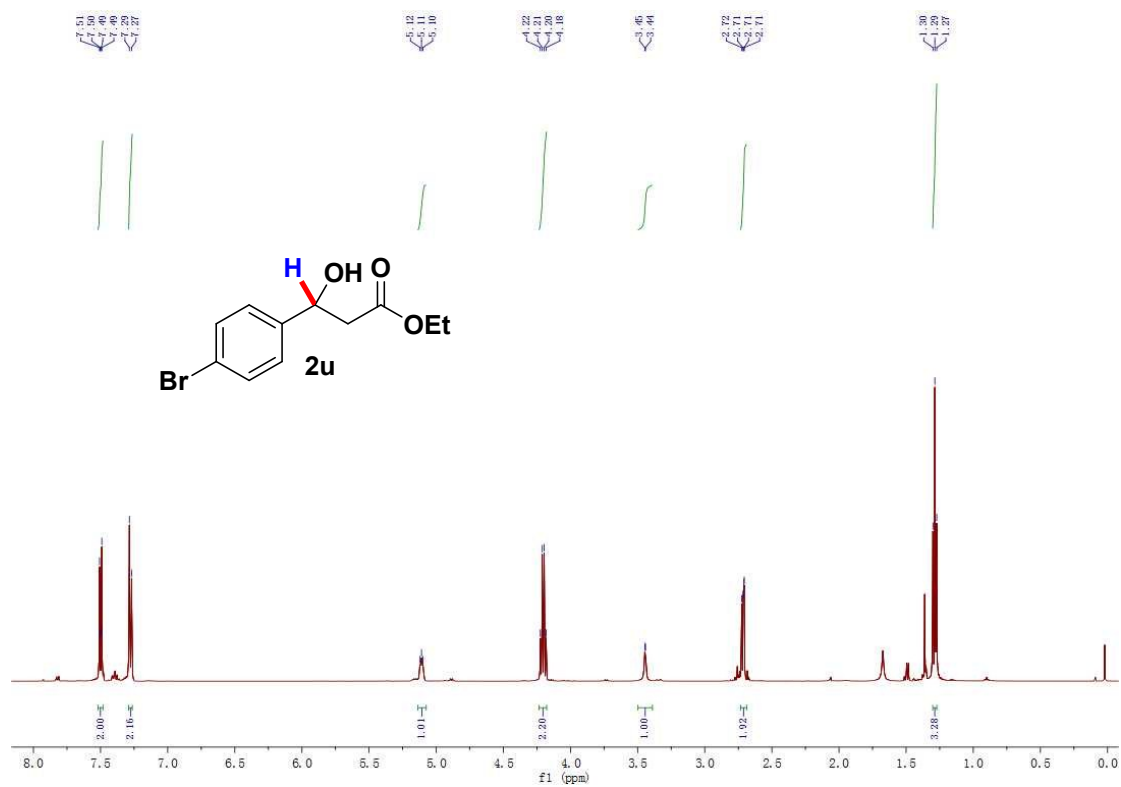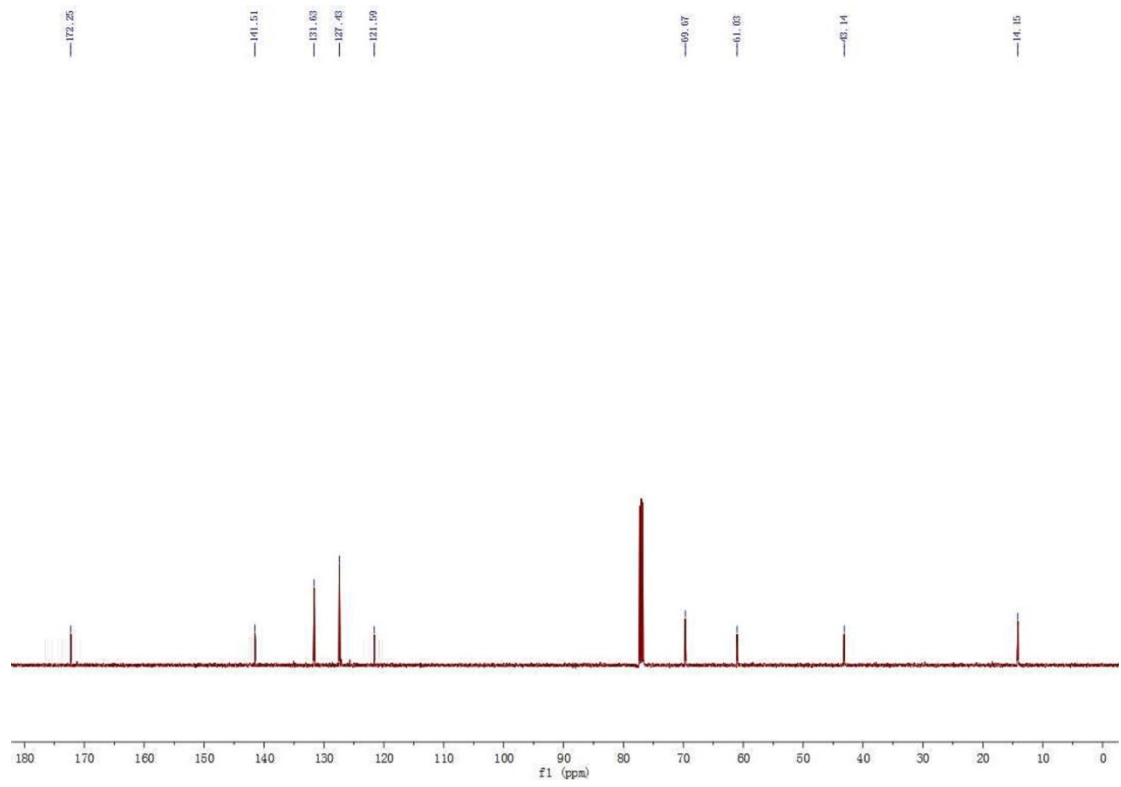

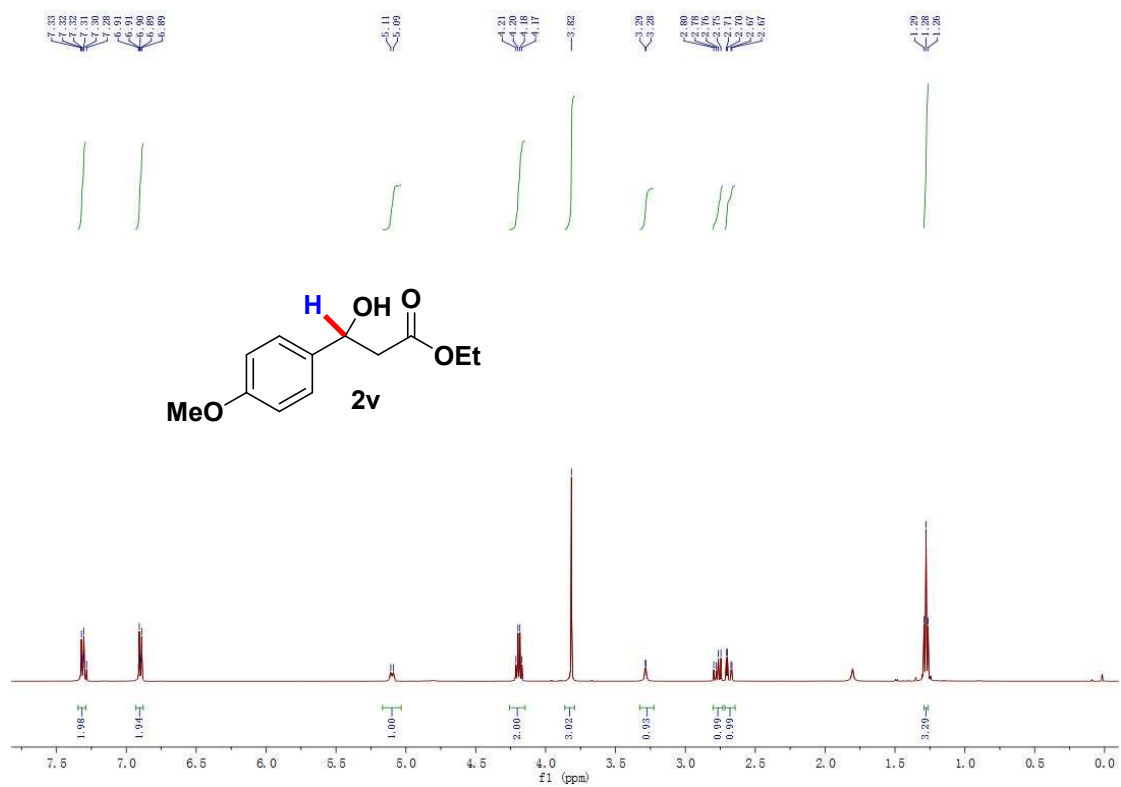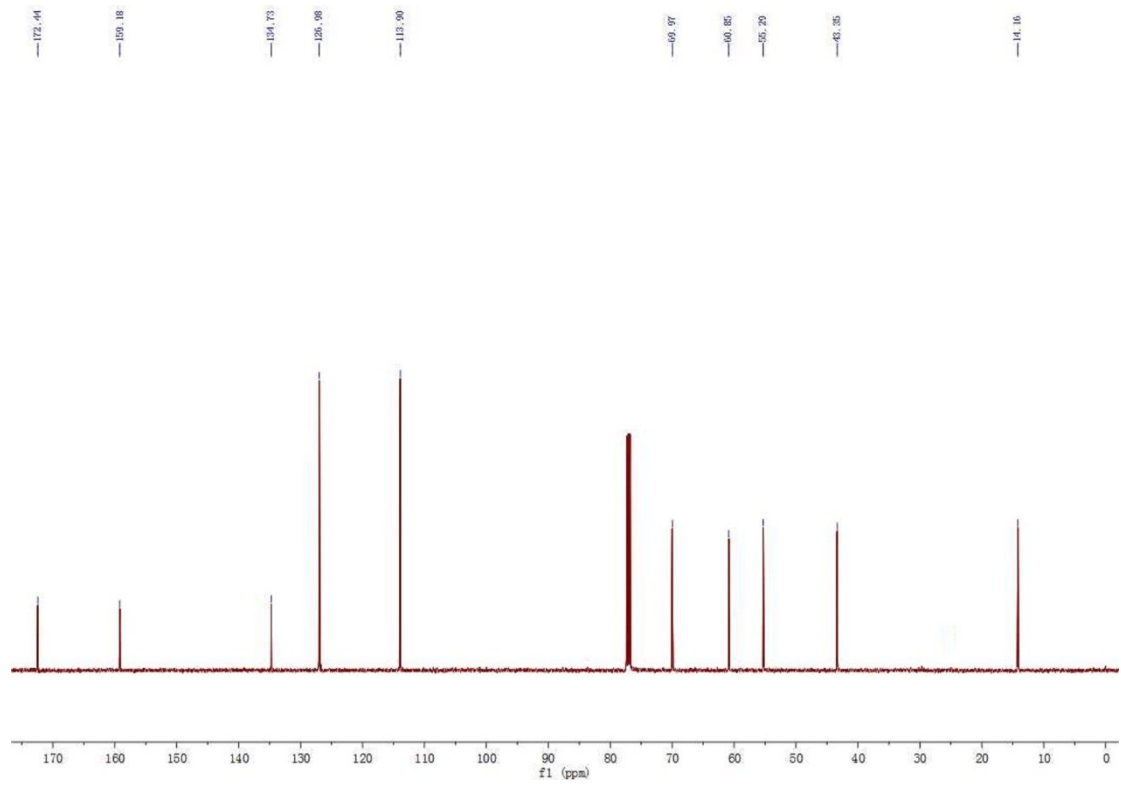

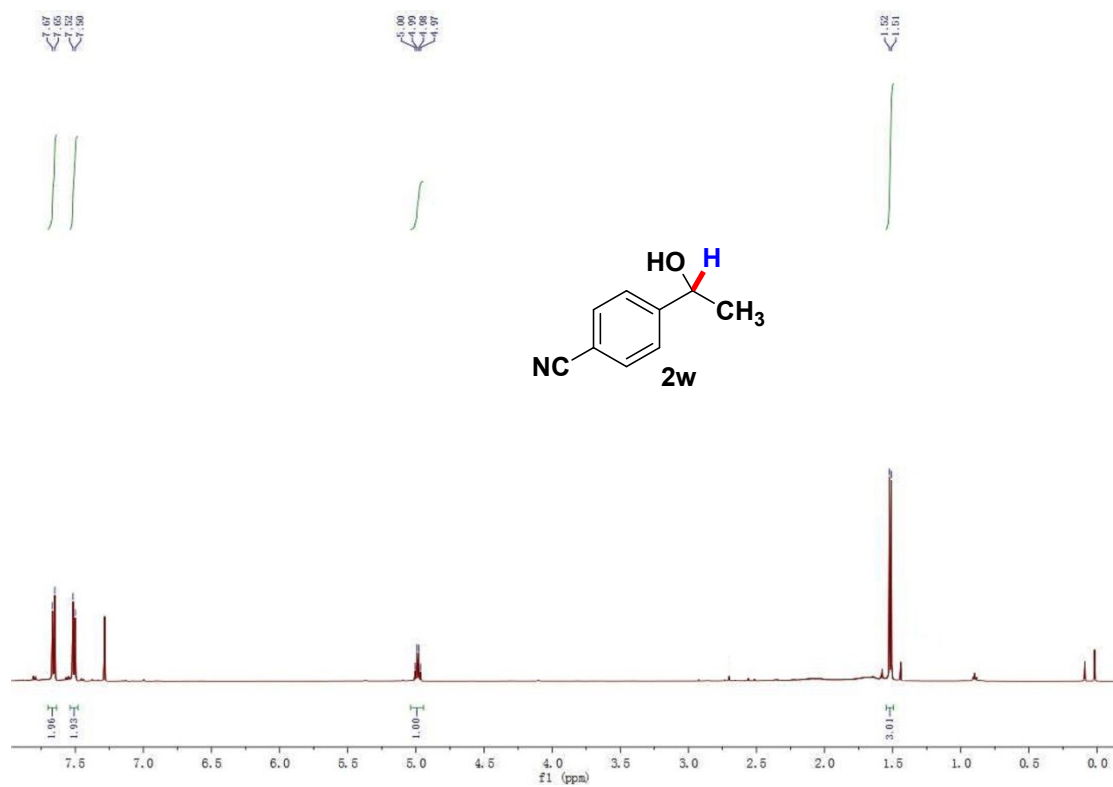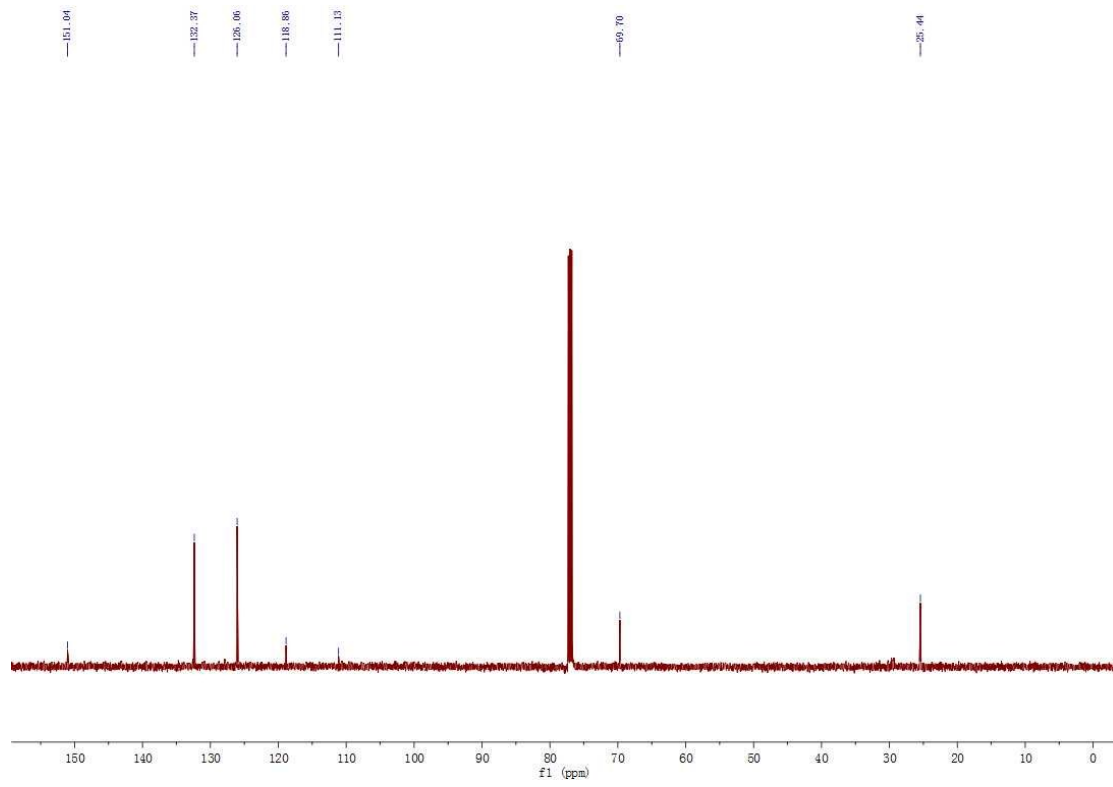

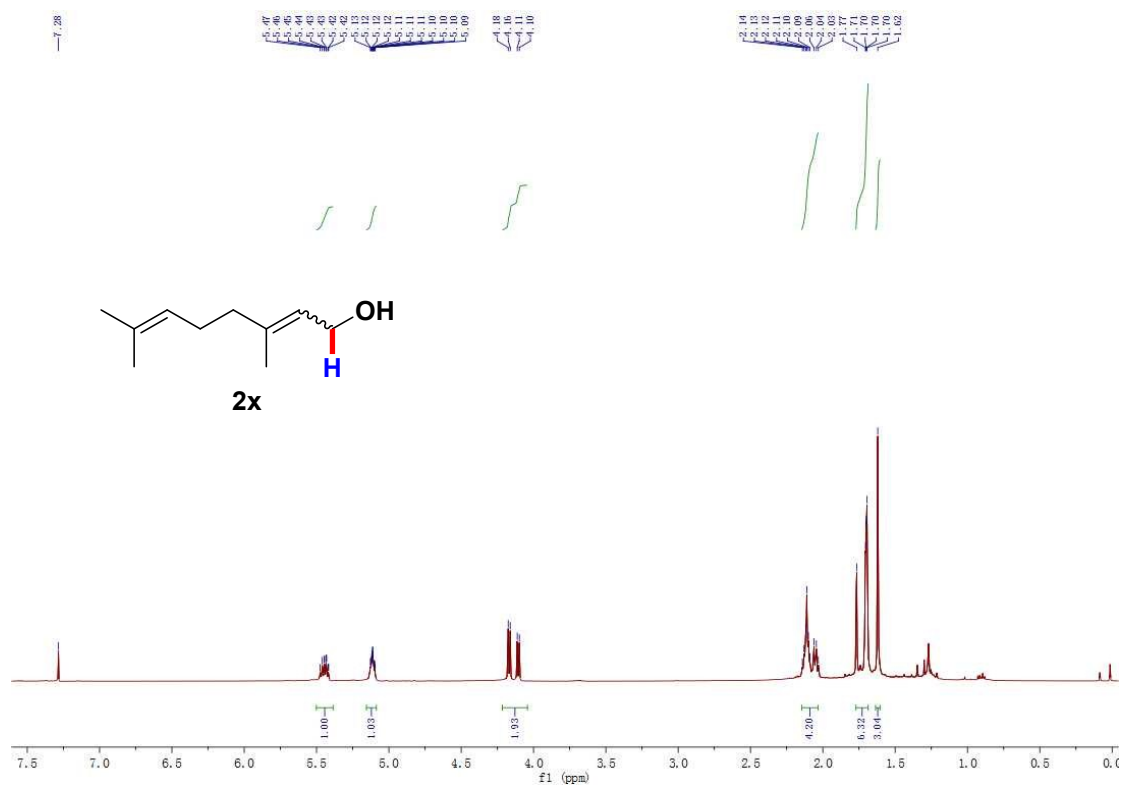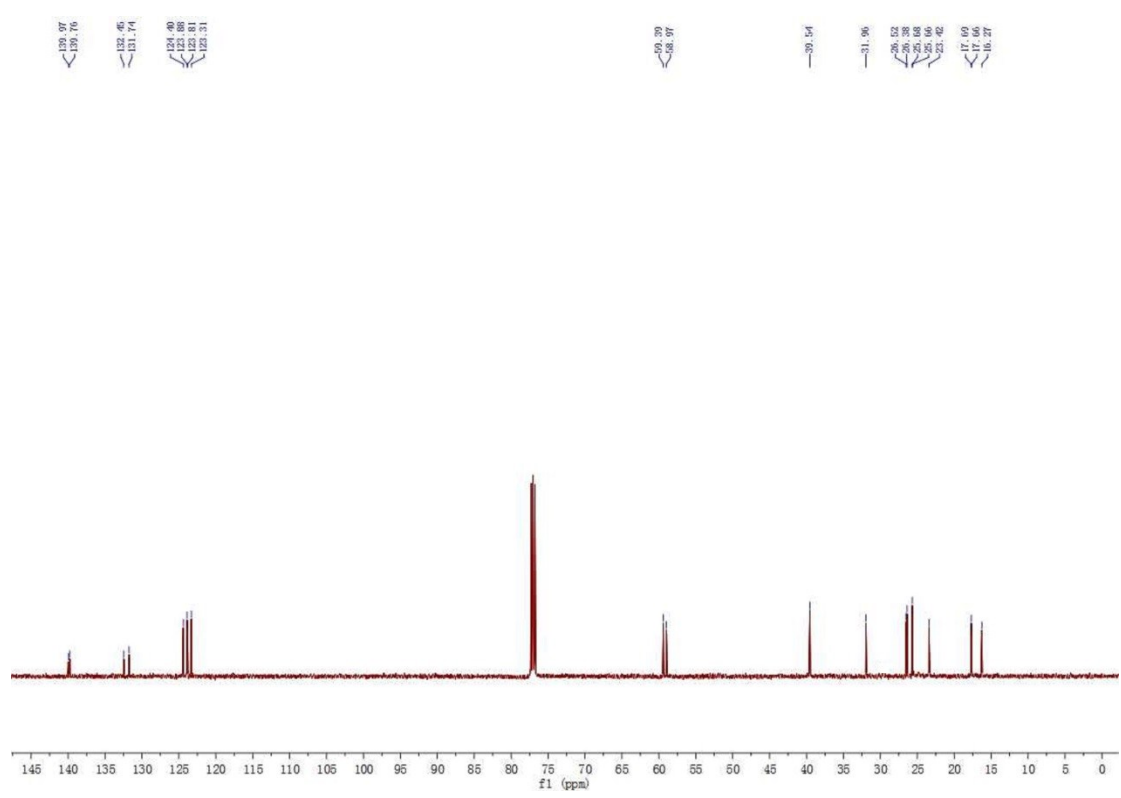

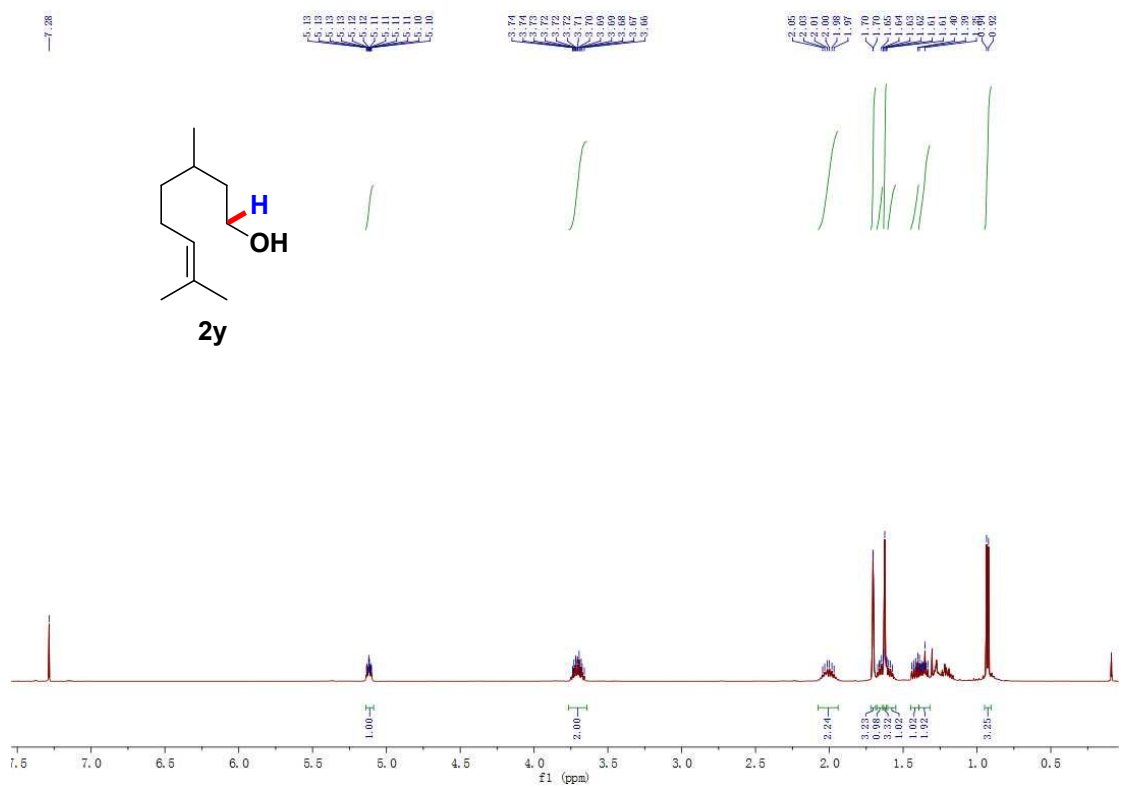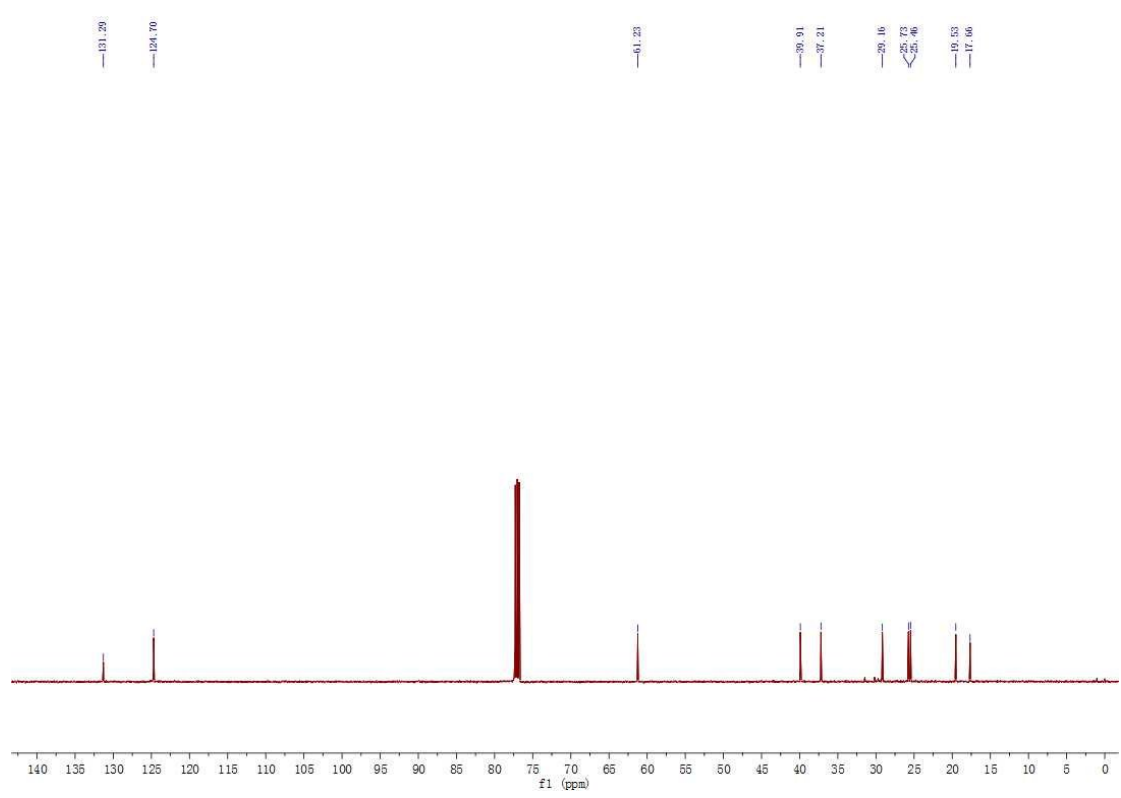



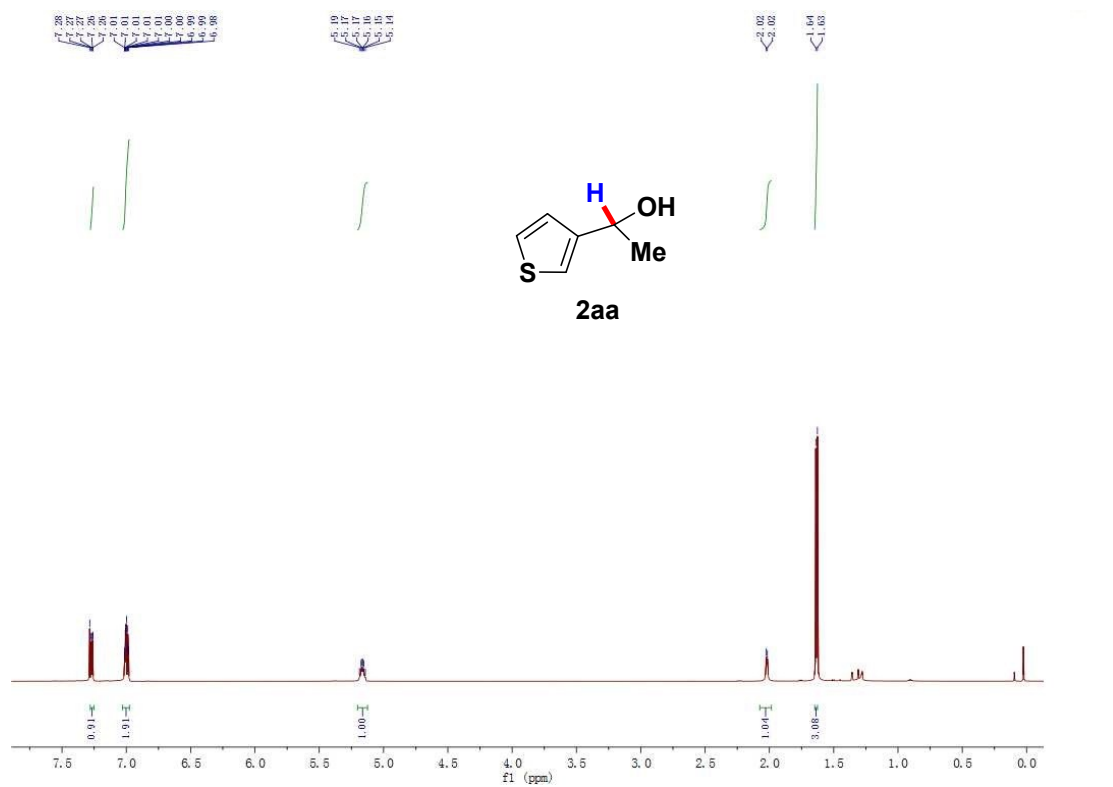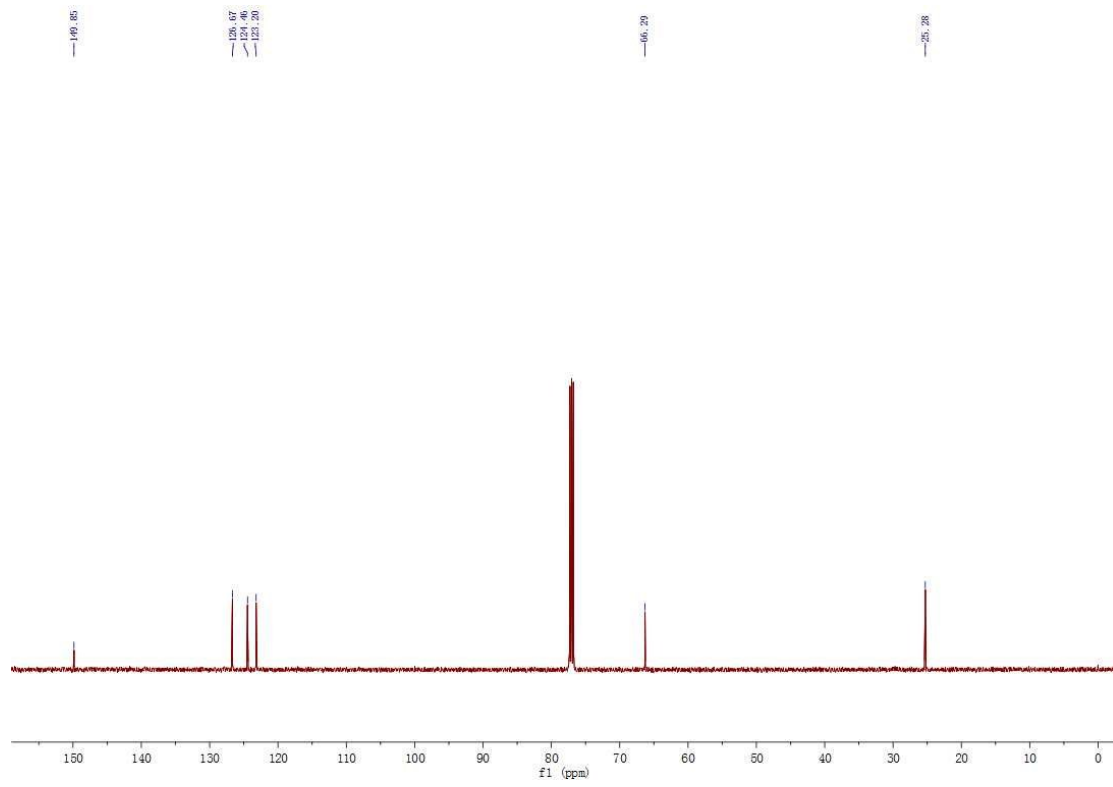



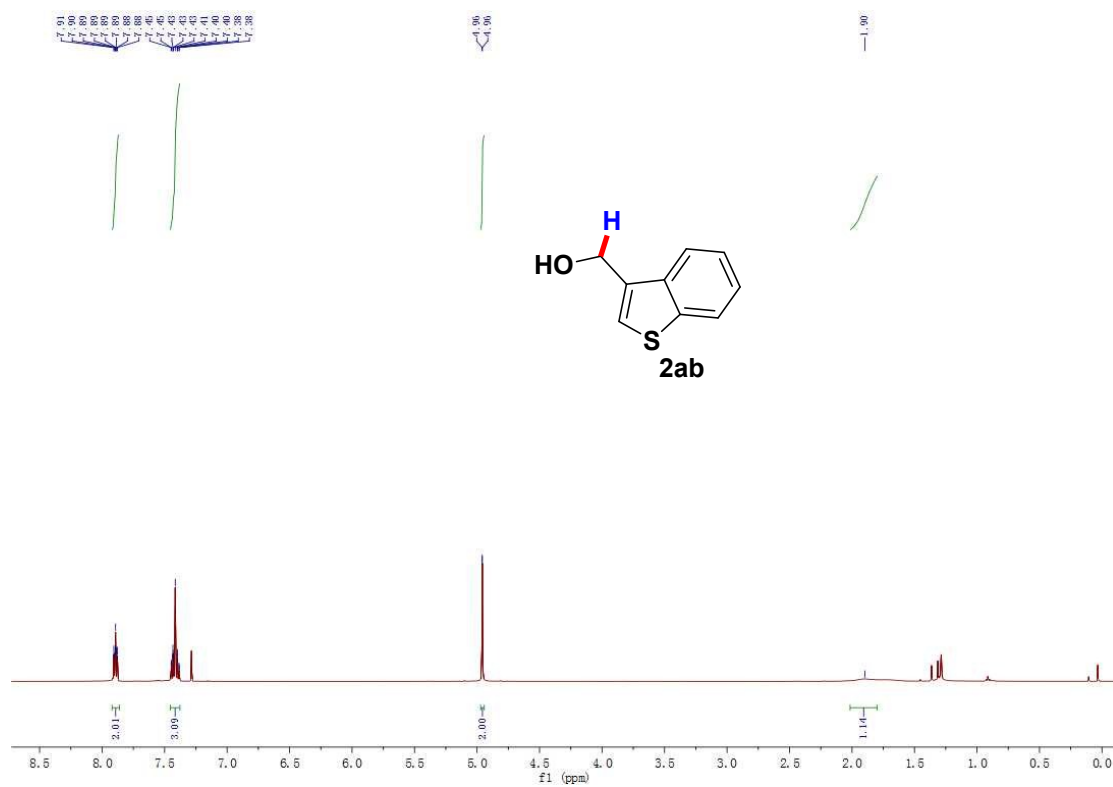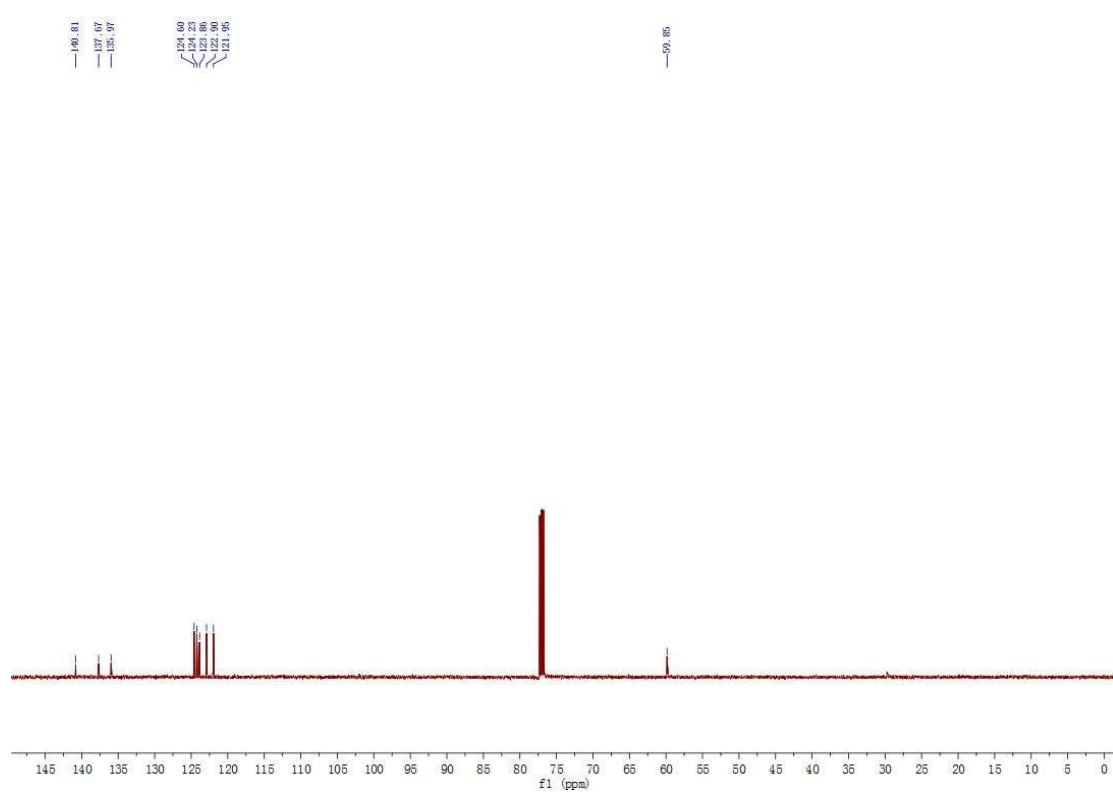

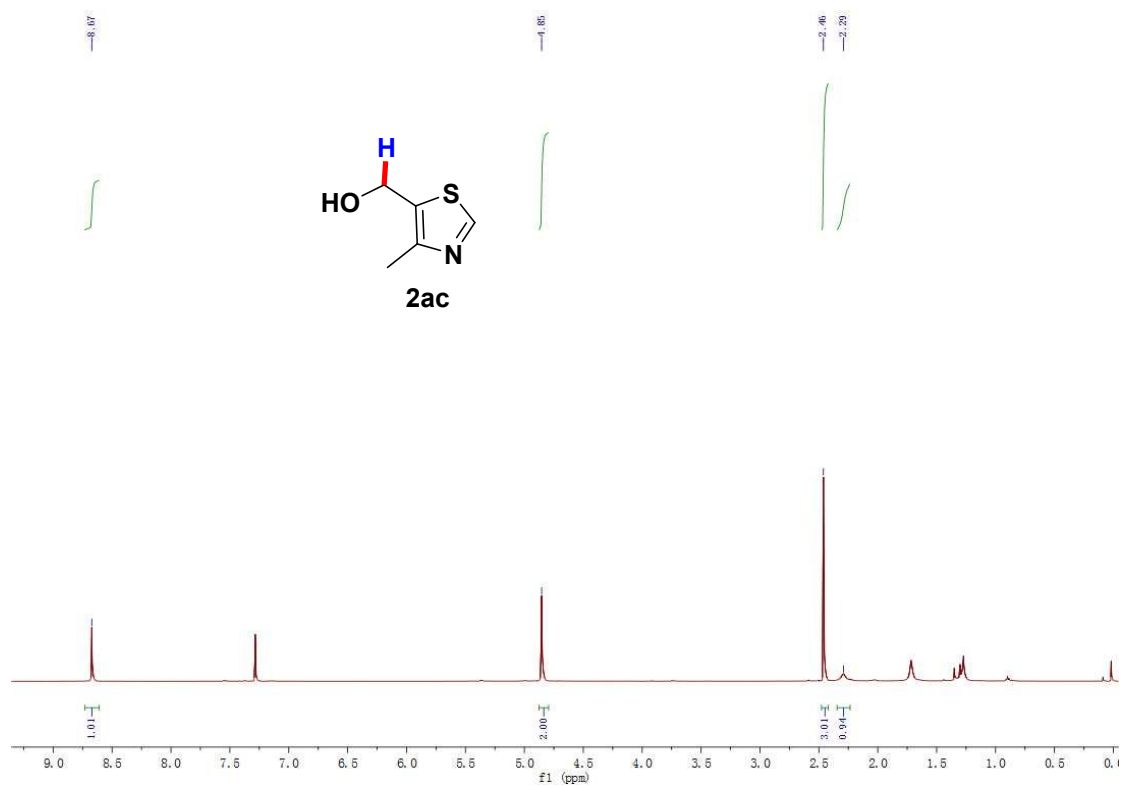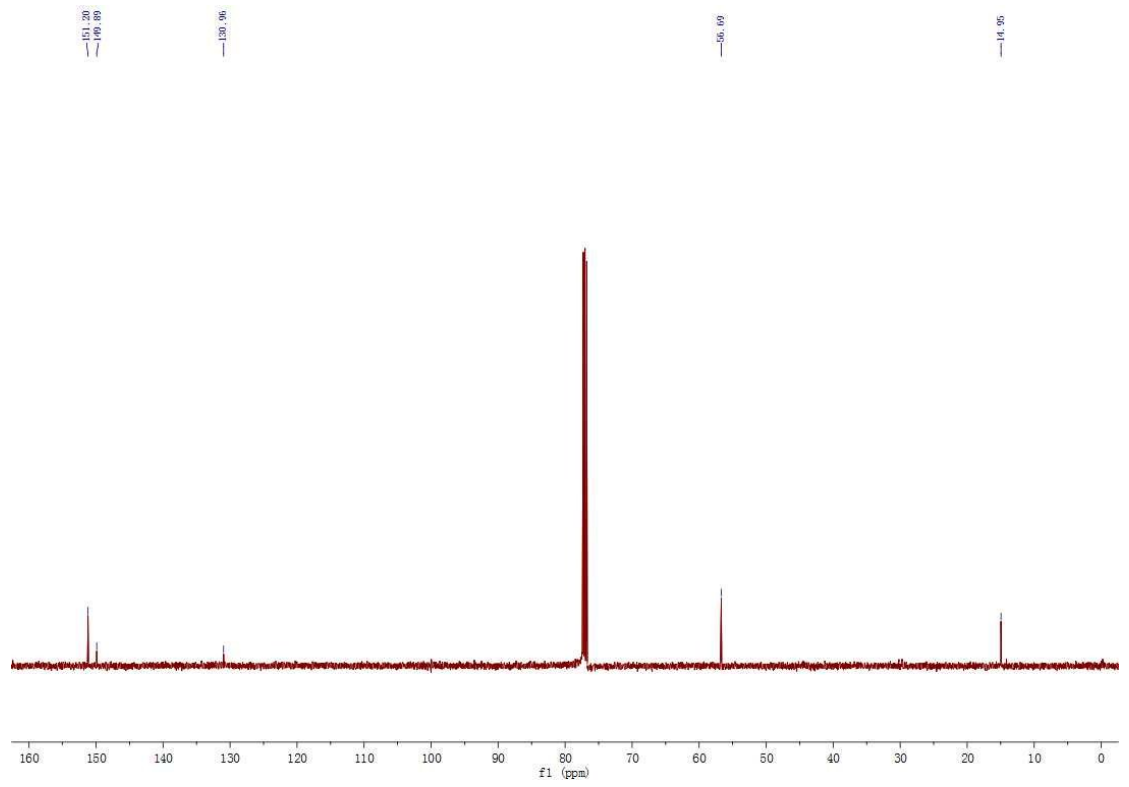

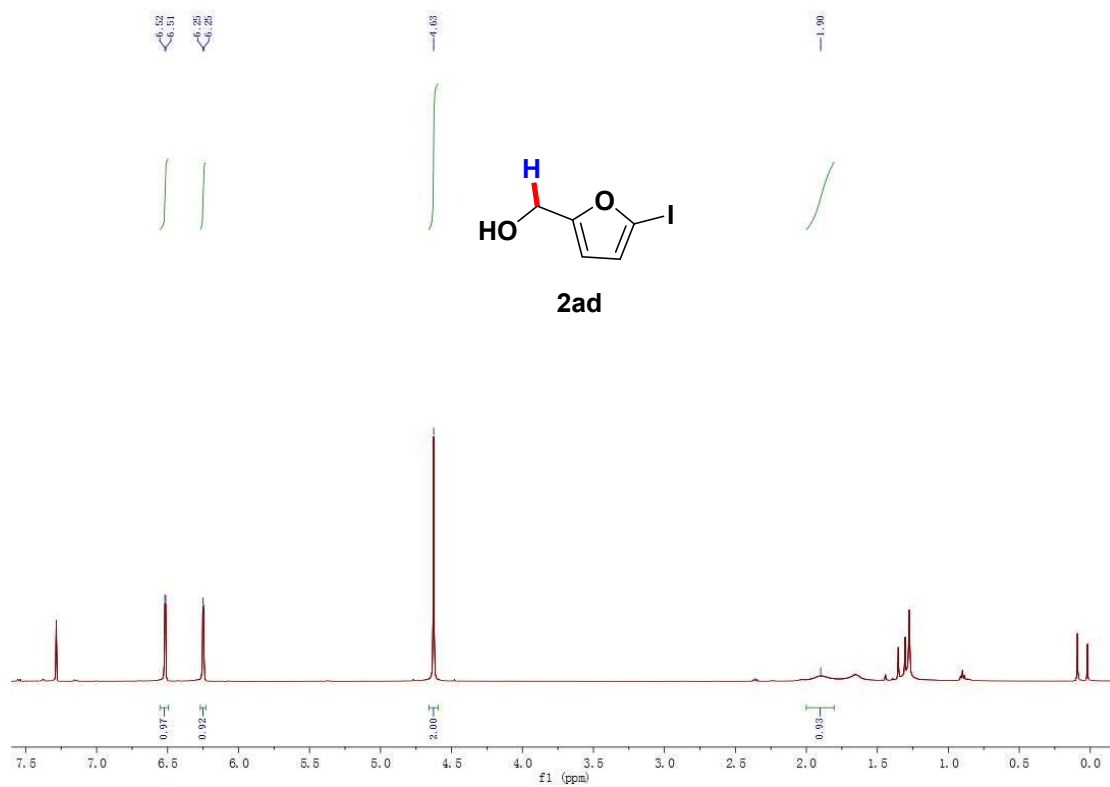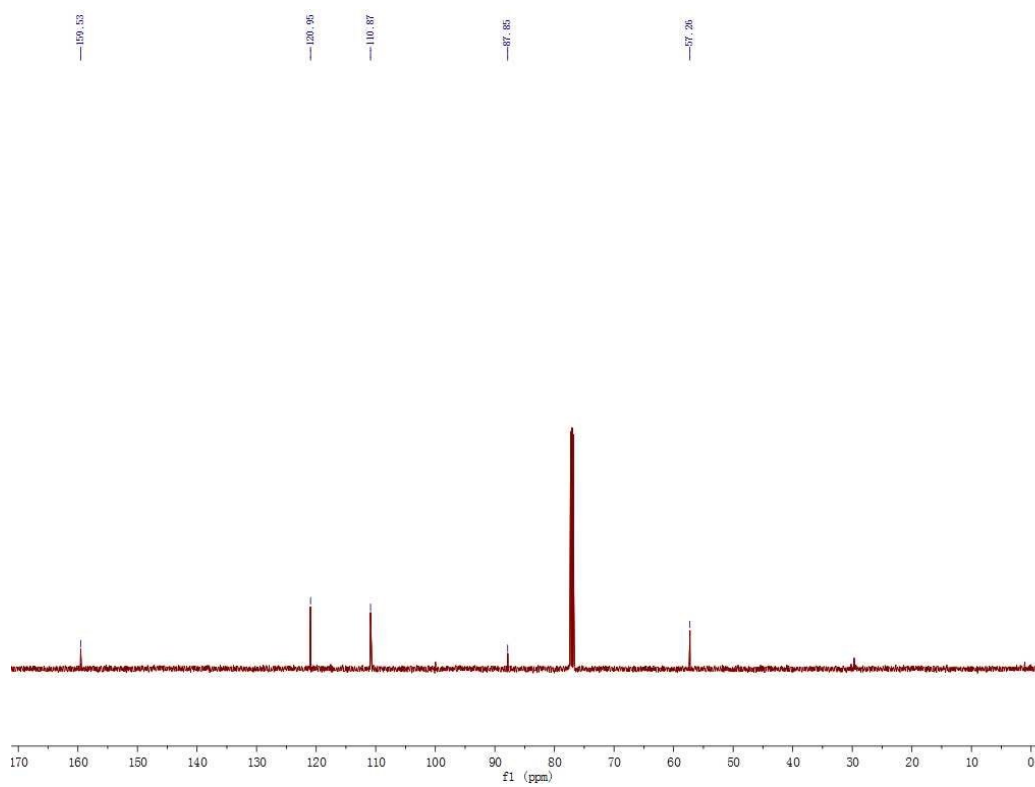

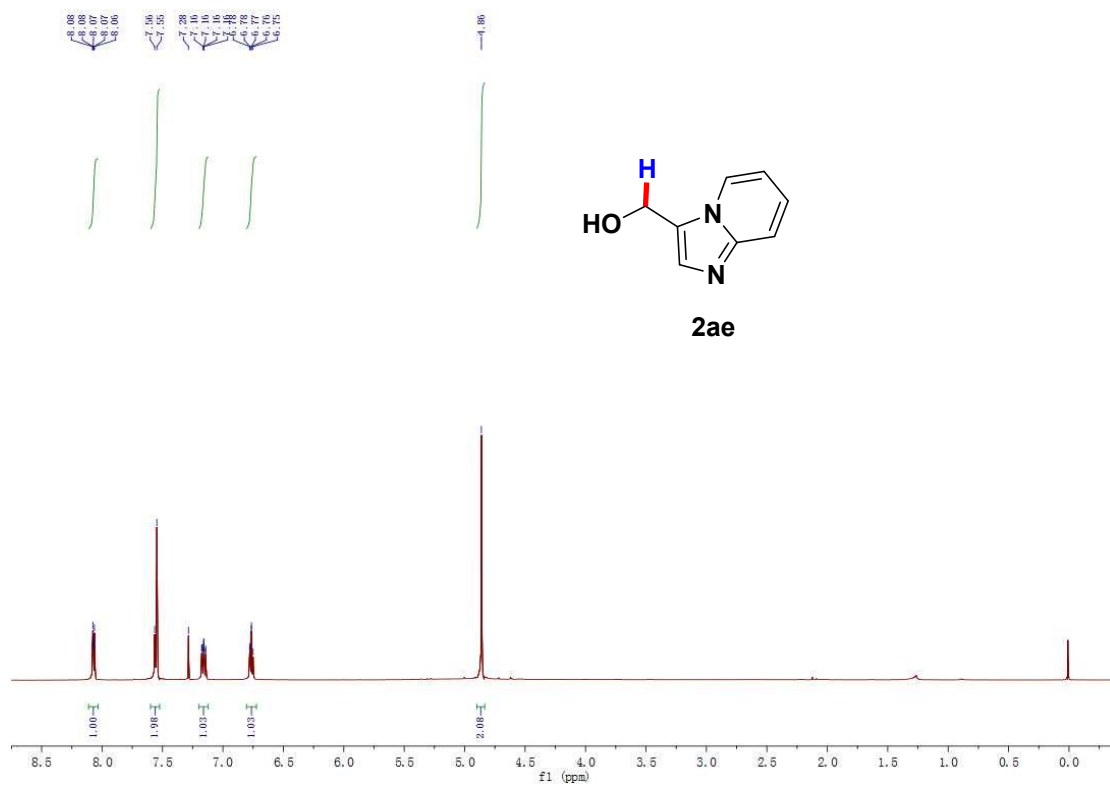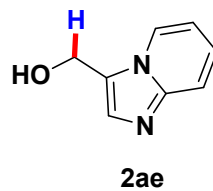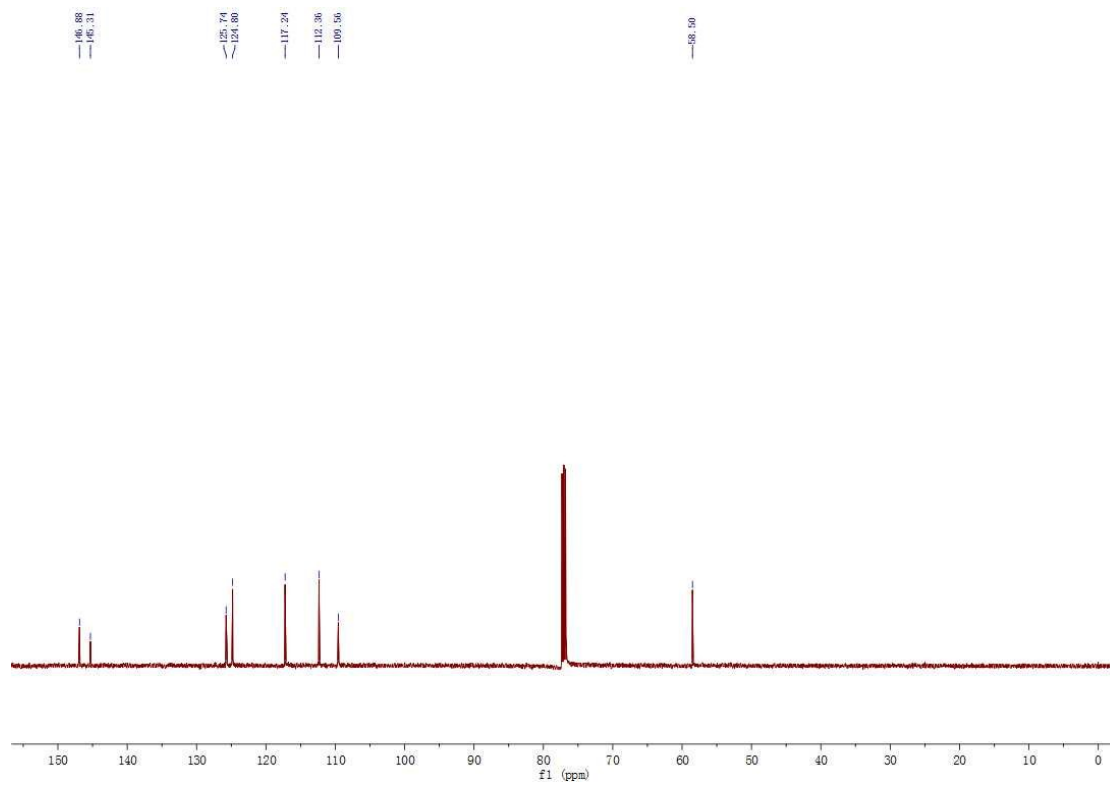

Supplement: c7ob00820a1.pdf [file c7ob00820a1.pdf]
